# Supplementary material
Source: publisher figshare collection journal article supplement (https://springernature.figshare.com/ndownloader/files/27603274)
Supplement: Supplementary file 1 [file 27603274]

## Additional file 4

### **Influence of the polar light cycle on seasonal dynamics of an Antarctic lake microbial community.**

Pratibha Panwar, Michelle A. Allen, Timothy J. Williams, Alyce M. Hancock, Sarah Brazendale, James Bevington, Simon Roux, David Paez-Espino, Stephen Nayfach, Maureen Berg, Frederik Schulz, Amy Chen, Marcel Huntemann, Nicole Shapiro, Nikos Kyrpides, Tanja Woyke, Emiley A. Eloë-Fadrosch and Ricardo Cavicchioli

## **Additional file 4: Viral analyses**

### **Supplementary Tables**

**Table S1** Complete, circular virus genomes in Ace Lake.

**Table S2** Summary of the virus and NCLDV clusters, singletons and contigs associated with *Phycodnaviridae* 1-5 OTUs.

**Table S3** Relative abundance-based correlation between *Micromonas* and *Phycodnaviridae* 1-5 OTUs.

**Table S4** Ace Lake cyanophage metadata.

**Table S5** *Chlorobium* viruses and their potential hosts.

**Table S6** Spacer sequences with matches to two CL1024 and one SG14554 contigs.

**Table S7** Host analysis of virus cluster 1024.

**Table S8** Most abundant virus clusters in Ace Lake.

**Table S9** Metadata associated with *Chlorobium* viruses.

**Table S10** Metadata for the cluster 24 ‘huge’ phage.

### **Dataset**

**Dataset S1** See accompanying dataset (excel file): Results of vContact clustering of putative *Chlorobium* phage sequences from Ace Lake with putative phage sequences from Trout Bog Lake.

**Table S1** Complete, circular virus genomes in Ace Lake.

| Clade <sup>A</sup>  | Ace Lake zone | Virus cluster or singleton <sup>B</sup> | GC content | Contig ID         | Taxon ID   | Metagenome <sup>C</sup><br>(sample collection date, depth, filter fraction) | Contig length (bp) |
|---------------------|---------------|-----------------------------------------|------------|-------------------|------------|-----------------------------------------------------------------------------|--------------------|
| <i>Caudovirales</i> | Upper         | 39                                      | 0.4        | Ga0208413_1000137 | 3300025513 | Nov 2008_U2_0.8 µm                                                          | 61,327             |
|                     |               |                                         |            | Ga0208414_1000255 | 3300025603 | Nov 2008_U3_0.8 µm                                                          | 61,327             |
| <i>Caudovirales</i> | Upper         | 61                                      | 0.34       | Ga0222634_1000074 | 3300023235 | Nov 2013_U3_0.1 µm                                                          | 60,667             |
| <i>Caudovirales</i> | Upper         | 86                                      | 0.34       | Ga0222644_1000071 | 3300022841 | Dec 2013_U1_3 µm                                                            | 57,734             |
|                     |               |                                         |            | Ga0222646_100034  | 3300022822 | Dec 2013_U1_0.1 µm                                                          | 57,734             |
|                     |               |                                         |            | Ga0222652_1000057 | 3300022853 | Jul 2014_U2_0.1 µm                                                          | 57,728             |
|                     |               |                                         |            | Ga0222711_1000019 | 3300022837 | 27Jan 2015_U1_0.1 µm                                                        | 57,728             |
|                     |               |                                         |            | Ga0222668_1000121 | 3300022865 | Oct 2014_U2_3 µm                                                            | 57,720             |
|                     |               |                                         |            | Ga0222674_1000083 | 3300022848 | Oct 2014_U3_3 µm                                                            | 57,720             |
| <i>Caudovirales</i> | Upper         | 88                                      | 0.36       | Ga0222631_1000001 | 3300022843 | Nov 2013_U2_0.1 µm                                                          | 198,785            |
| <i>Caudovirales</i> | Upper         | 94                                      | 0.59       | Ga0222649_1000036 | 3300022839 | Feb 2014_U1_0.1 µm                                                          | 56,488             |
| <i>Caudovirales</i> | Upper         | 182                                     | 0.48       | Ga0222686_1000050 | 3300023501 | Dec 2014_U2_3 µm                                                            | 61,266             |
| <i>Caudovirales</i> | Upper         | 190                                     | 0.43       | Ga0208414_1000068 | 3300025603 | Nov 2008_U3_0.8 µm                                                          | 116,917            |
|                     |               |                                         |            | Ga0222630_1000008 | 3300023243 | Nov 2013_U2_0.8 µm                                                          | 110,308            |
|                     |               |                                         |            | Ga0222645_100024  | 3300022833 | Dec 2013_U1_0.8 µm                                                          | 110,283            |
| <i>Caudovirales</i> | Upper         | 294                                     | 0.37       | Ga0222651_1000297 | 3300022866 | Jul 2014_U2_0.8 µm                                                          | 35,773             |
| <i>Caudovirales</i> | Upper         | 355                                     | 0.49       | Ga0222631_1000054 | 3300022843 | Nov 2013_U2_0.1 µm                                                          | 34,439             |
|                     |               |                                         |            | Ga0222652_1000162 | 3300022853 | Jul 2014_U2_0.1 µm                                                          | 34,439             |

|                     |       |     |      |                   |            |                      |        |
|---------------------|-------|-----|------|-------------------|------------|----------------------|--------|
| <i>Caudovirales</i> | Upper | 415 | 0.47 | Ga0222676_1000131 | 3300023240 | Oct 2014_U3_0.1 µm   | 32,297 |
|                     |       |     |      | Ga0222654_1000364 | 3300022836 | Jul 2014_U3_0.8 µm   | 32,288 |
| <i>Caudovirales</i> | Upper | 440 | 0.52 | Ga0222648_1000052 | 3300023054 | Feb 2014_U1_0.8 µm   | 60,542 |
| <i>Caudovirales</i> | Upper | 468 | 0.43 | Ga0208768_1000361 | 3300025601 | Nov 2008_U2_3 µm     | 31,641 |
| <i>Caudovirales</i> | Upper | 548 | 0.33 | Ga0222652_1000145 | 3300022853 | Jul 2014_U2_0.1 µm   | 36,399 |
|                     |       |     |      | Ga0222659_1000274 | 3300023236 | Aug 2014_U2_3 µm     | 36,399 |
|                     |       |     |      | Ga0222660_1000153 | 3300023239 | Aug 2014_U2_0.8 µm   | 36,399 |
|                     |       |     |      | Ga0222670_1000118 | 3300023294 | Oct 2014_U2_0.1 µm   | 36,399 |
|                     |       |     |      | Ga0222676_1000104 | 3300023240 | Oct 2014_U3_0.1 µm   | 36,399 |
|                     |       |     |      | Ga0222689_1000137 | 3300023231 | Dec 2014_U3_3 µm     | 36,399 |
|                     |       |     |      | Ga0222711_1000047 | 3300022837 | 27Jan 2015_U1_0.1 µm | 36,399 |
| <i>Caudovirales</i> | Upper | 563 | 0.34 | Ga0222663_1000084 | 3300022845 | Aug 2014_U3_0.8 µm   | 71,162 |
|                     |       |     |      | Ga0222676_1000026 | 3300023240 | Oct 2014_U3_0.1 µm   | 71,162 |
|                     |       |     |      | Ga0222690_1000051 | 3300023227 | Dec 2014_U3_0.8 µm   | 71,162 |
|                     |       |     |      | Ga0222691_1000031 | 3300022851 | Dec 2014_U3_0.1 µm   | 71,162 |
| <i>Caudovirales</i> | Upper | 578 | 0.39 | Ga0208768_1000193 | 3300025601 | Nov 2008_U2_3 µm     | 46,295 |
|                     |       |     |      | Ga0222711_1000027 | 3300022837 | 27Jan 2015_U1_0.1 µm | 43,333 |
| <i>Caudovirales</i> | Upper | 614 | 0.38 | Ga0222629_1000113 | 3300022867 | Nov 2013_U2_3 µm     | 32,140 |
|                     |       |     |      | Ga0222631_1000063 | 3300022843 | Nov 2013_U2_0.1 µm   | 32,140 |
|                     |       |     |      | Ga0222652_1000183 | 3300022853 | Jul 2014_U2_0.1 µm   | 32,140 |

|                     |       |     |      |                   |            |                      |        |
|---------------------|-------|-----|------|-------------------|------------|----------------------|--------|
|                     |       |     |      | Ga0222661_1000169 | 3300023229 | Aug 2014_U2_0.1 µm   | 32,140 |
|                     |       |     |      | Ga0222711_1000069 | 3300022837 | 27Jan 2015_U1_0.1 µm | 32,138 |
|                     |       |     |      | Ga0208646_1000327 | 3300025425 | Nov 2008_U2_0.1 µm   | 31,918 |
|                     |       |     |      | Ga0208770_1000334 | 3300025438 | Nov 2008_U3_0.1 µm   | 31,918 |
| <i>Caudovirales</i> | Upper | 619 | 0.34 | Ga0222629_1000065 | 3300022867 | Nov 2013_U2_3 µm     | 40,762 |
| <i>Caudovirales</i> | Upper | 685 | 0.34 | Ga0222630_1000110 | 3300023243 | Nov 2013_U2_0.8 µm   | 41,001 |
|                     |       |     |      | Ga0222644_1000115 | 3300022841 | Dec 2013_U1_3 µm     | 41,001 |
|                     |       |     |      | Ga0222676_1000088 | 3300023240 | Oct 2014_U3_0.1 µm   | 41,001 |
|                     |       |     |      | Ga0222688_1000030 | 3300023293 | Dec 2014_U2_0.1 µm   | 41,001 |
|                     |       |     |      | Ga0222691_1000082 | 3300022851 | Dec 2014_U3_0.1 µm   | 41,001 |
|                     |       |     |      | Ga0222711_1000034 | 3300022837 | 27Jan 2015_U1_0.1 µm | 41,001 |
|                     |       |     |      | Ga0222631_1000036 | 3300022843 | Nov 2013_U2_0.1 µm   | 40,999 |
|                     |       |     |      | Ga0222652_1000113 | 3300022853 | Jul 2014_U2_0.1 µm   | 40,988 |
|                     |       |     |      | Ga0222661_1000105 | 3300023229 | Aug 2014_U2_0.1 µm   | 40,921 |
|                     |       |     |      | Ga0222675_1000133 | 3300023238 | Oct 2014_U3_0.8 µm   | 40,899 |
| <i>Caudovirales</i> | Upper | 723 | 0.6  | Ga0222669_1000080 | 3300022825 | Oct 2014_U2_0.8 µm   | 34,304 |
| <i>Caudovirales</i> | Upper | 727 | 0.3  | Ga0222690_1000105 | 3300023227 | Dec 2014_U3_0.8 µm   | 31,608 |
| <i>Caudovirales</i> | Upper | 811 | 0.38 | Ga0222651_1000265 | 3300022866 | Jul 2014_U2_0.8 µm   | 37,577 |
|                     |       |     |      | Ga0222652_1000135 | 3300022853 | Jul 2014_U2_0.1 µm   | 37,577 |
|                     |       |     |      | Ga0222653_1000212 | 3300022857 | Jul 2014_U3_3 µm     | 37,577 |

|                     |       |     |      |                   |            |                    |        |
|---------------------|-------|-----|------|-------------------|------------|--------------------|--------|
|                     |       |     |      | Ga0222659_1000254 | 3300023236 | Aug 2014_U2_3 µm   | 37,577 |
|                     |       |     |      | Ga0222660_1000148 | 3300023239 | Aug 2014_U2_0.8 µm | 37,577 |
|                     |       |     |      | Ga0222661_1000134 | 3300023229 | Aug 2014_U2_0.1 µm | 37,577 |
|                     |       |     |      | Ga0222668_1000262 | 3300022865 | Oct 2014_U2_3 µm   | 37,577 |
|                     |       |     |      | Ga0222669_1000067 | 3300022825 | Oct 2014_U2_0.8 µm | 37,577 |
|                     |       |     |      | Ga0222670_1000107 | 3300023294 | Oct 2014_U2_0.1 µm | 37,577 |
|                     |       |     |      | Ga0222674_1000132 | 3300022848 | Oct 2014_U3_3 µm   | 37,577 |
|                     |       |     |      | Ga0222675_1000143 | 3300023238 | Oct 2014_U3_0.8 µm | 37,577 |
|                     |       |     |      | Ga0222676_1000100 | 3300023240 | Oct 2014_U3_0.1 µm | 37,577 |
|                     |       |     |      | Ga0222686_1000106 | 3300023501 | Dec 2014_U2_3 µm   | 37,577 |
|                     |       |     |      | Ga0222687_1000052 | 3300022844 | Dec 2014_U2_0.8 µm | 37,577 |
|                     |       |     |      | Ga0222688_1000043 | 3300023293 | Dec 2014_U2_0.1 µm | 37,577 |
| <i>Caudovirales</i> | Upper | 814 | 0.5  | Ga0222674_1000138 | 3300022848 | Oct 2014_U3_3 µm   | 36,364 |
| <i>Caudovirales</i> | Upper | 834 | 0.57 | Ga0222664_1000268 | 3300023296 | Aug 2014_U3_0.1 µm | 36,977 |
|                     |       |     |      | Ga0222676_1000102 | 3300023240 | Oct 2014_U3_0.1 µm | 36,977 |
| <i>Caudovirales</i> | Upper | 843 | 0.43 | Ga0208414_1000192 | 3300025603 | Nov 2008_U3_0.8 µm | 69,370 |
|                     |       |     |      | Ga0208646_1000071 | 3300025425 | Nov 2008_U2_0.1 µm | 69,370 |
| <i>Caudovirales</i> | Upper | 922 | 0.35 | Ga0222634_1000130 | 3300023235 | Nov 2013_U3_0.1 µm | 44,118 |
| <i>Caudovirales</i> | Upper | 925 | 0.43 | Ga0208646_1000125 | 3300025425 | Nov 2008_U2_0.1 µm | 55,014 |
| <i>Caudovirales</i> | Upper | 936 | 0.3  | Ga0208768_1000068 | 3300025601 | Nov 2008_U2_3 µm   | 82,754 |

|                     |       |      |      |                   |            |                    |        |
|---------------------|-------|------|------|-------------------|------------|--------------------|--------|
|                     |       |      |      | Ga0208646_1000042 | 3300025425 | Nov 2008_U2_0.1 µm | 82,750 |
|                     |       |      |      | Ga0208770_1000054 | 3300025438 | Nov 2008_U3_0.1 µm | 82,750 |
|                     |       |      |      | Ga0208903_1000111 | 3300025502 | Nov 2008_U3_3 µm   | 82,721 |
| <i>Caudovirales</i> | Upper | 960  | 0.45 | Ga0222688_1000057 | 3300023293 | Dec 2014_U2_0.1 µm | 33,844 |
| <i>Caudovirales</i> | Upper | 961  | 0.35 | Ga0222644_1000054 | 3300022841 | Dec 2013_U1_3 µm   | 65,450 |
| <i>Caudovirales</i> | Upper | 1134 | 0.56 | Ga0222652_1000107 | 3300022853 | Jul 2014_U2_0.1 µm | 42,580 |
| <i>Caudovirales</i> | Upper | 1234 | 0.45 | Ga0222649_1000109 | 3300022839 | Feb 2014_U1_0.1 µm | 32,238 |
| <i>Caudovirales</i> | Upper | 1255 | 0.45 | Ga0208414_1000468 | 3300025603 | Nov 2008_U3_0.8 µm | 40,133 |
|                     |       |      |      | Ga0208646_1000215 | 3300025425 | Nov 2008_U2_0.1 µm | 40,133 |
|                     |       |      |      | Ga0208768_1000236 | 3300025601 | Nov 2008_U2_3 µm   | 40,133 |
|                     |       |      |      | Ga0208770_1000240 | 3300025438 | Nov 2008_U3_0.1 µm | 40,133 |
|                     |       |      |      | Ga0208903_1000351 | 3300025502 | Nov 2008_U3_3 µm   | 40,133 |
| <i>Caudovirales</i> | Upper | 1303 | 0.46 | Ga0222652_1000051 | 3300022853 | Jul 2014_U2_0.1 µm | 59,036 |
|                     |       |      |      | Ga0222688_1000009 | 3300023293 | Dec 2014_U2_0.1 µm | 59,036 |
|                     |       |      |      | Ga0222691_1000045 | 3300022851 | Dec 2014_U3_0.1 µm | 59,036 |
|                     |       |      |      | Ga0222661_1000055 | 3300023229 | Aug 2014_U2_0.1 µm | 58,976 |
| <i>Caudovirales</i> | Upper | 1389 | 0.56 | Ga0222633_1000195 | 3300022847 | Nov 2013_U3_0.8 µm | 67,914 |
|                     |       |      |      | Ga0222632_1000099 | 3300022842 | Nov 2013_U3_3 µm   | 67,839 |
|                     |       |      |      | Ga0222634_1000056 | 3300023235 | Nov 2013_U3_0.1 µm | 67,839 |
| <i>Caudovirales</i> | Upper | 1609 | 0.41 | Ga0208770_1000293 | 3300025438 | Nov 2008_U3_0.1 µm | 35,550 |

|                     |       |      |      |                   |            |                      |        |
|---------------------|-------|------|------|-------------------|------------|----------------------|--------|
|                     |       |      |      | Ga0208646_1000275 | 3300025425 | Nov 2008_U2_0.1 µm   | 35,530 |
| <i>Caudovirales</i> | Upper | 1614 | 0.56 | Ga0208414_1000465 | 3300025603 | Nov 2008_U3_0.8 µm   | 40,262 |
| <i>Caudovirales</i> | Upper | 1687 | 0.36 | Ga0222649_1000033 | 3300022839 | Feb 2014_U1_0.1 µm   | 60,587 |
| <i>Caudovirales</i> | Upper | 1925 | 0.37 | Ga0222670_1000134 | 3300023294 | Oct 2014_U2_0.1 µm   | 34,611 |
| <i>Caudovirales</i> | Upper | 1931 | 0.4  | Ga0222629_1000098 | 3300022867 | Nov 2013_U2_3 µm     | 35,224 |
|                     |       |      |      | Ga0222631_1000049 | 3300022843 | Nov 2013_U2_0.1 µm   | 35,224 |
|                     |       |      |      | Ga0222652_1000154 | 3300022853 | Jul 2014_U2_0.1 µm   | 35,224 |
| <i>Caudovirales</i> | Upper | 2074 | 0.55 | Ga0222632_1000124 | 3300022842 | Nov 2013_U3_3 µm     | 57,505 |
| <i>Caudovirales</i> | Upper | 2122 | 0.36 | Ga0222651_1000121 | 3300022866 | Jul 2014_U2_0.8 µm   | 58,728 |
| <i>Caudovirales</i> | Upper | 2251 | 0.44 | Ga0222633_1000388 | 3300022847 | Nov 2013_U3_0.8 µm   | 42,580 |
| <i>Caudovirales</i> | Upper | 2260 | 0.31 | Ga0222660_1000154 | 3300023239 | Aug 2014_U2_0.8 µm   | 36,315 |
| <i>Caudovirales</i> | Upper | 2466 | 0.42 | Ga0208770_1000066 | 3300025438 | Nov 2008_U3_0.1 µm   | 75,636 |
| <i>Caudovirales</i> | Upper | 2664 | 0.42 | Ga0222646_100080  | 3300022822 | Dec 2013_U1_0.1 µm   | 35,853 |
|                     |       |      |      | Ga0222652_1000149 | 3300022853 | Jul 2014_U2_0.1 µm   | 35,853 |
|                     |       |      |      | Ga0222661_1000141 | 3300023229 | Aug 2014_U2_0.1 µm   | 35,853 |
|                     |       |      |      | Ga0222670_1000120 | 3300023294 | Oct 2014_U2_0.1 µm   | 35,853 |
|                     |       |      |      | Ga0222688_1000048 | 3300023293 | Dec 2014_U2_0.1 µm   | 35,853 |
|                     |       |      |      | Ga0222711_1000048 | 3300022837 | 27Jan 2015_U1_0.1 µm | 35,853 |
| <i>Caudovirales</i> | Upper | 3129 | 0.33 | Ga0222650_1000104 | 3300023237 | Jul 2014_U2_3 µm     | 76,097 |
| <i>Caudovirales</i> | Upper | 3153 | 0.33 | Ga0222631_1000051 | 3300022843 | Nov 2013_U2_0.1 µm   | 34,975 |

|                     |       |      |      |                   |            |                     |        |
|---------------------|-------|------|------|-------------------|------------|---------------------|--------|
|                     |       |      |      | Ga0222652_1000157 | 3300022853 | Jul 2014_U2_0.1 µm  | 34,975 |
| <i>Caudovirales</i> | Upper | 3169 | 0.39 | Ga0222688_1000054 | 3300023293 | Dec 2014_U2_0.1 µm  | 35,117 |
| <i>Caudovirales</i> | Upper | 3187 | 0.46 | Ga0222650_1000438 | 3300023237 | Jul 2014_U2_3 µm    | 32,633 |
|                     |       |      |      | Ga0222652_1000180 | 3300022853 | Jul 2014_U2_0.1 µm  | 32,633 |
| <i>Caudovirales</i> | Upper | 3592 | 0.33 | Ga0208414_1000754 | 3300025603 | Nov 2008_U3_0.8 µm  | 28,792 |
| <i>Caudovirales</i> | Upper | 3890 | 0.38 | Ga0222691_1000046 | 3300022851 | Dec 2014_U3_0.1 µm  | 58,779 |
| <i>Caudovirales</i> | Upper | 3895 | 0.32 | Ga0222691_1000080 | 3300022851 | Dec 2014_U3_0.1 µm  | 41,353 |
| <i>Caudovirales</i> | Upper | 3927 | 0.33 | Ga0222649_1000115 | 3300022839 | Feb 2014_U1_0.1 µm  | 30,893 |
|                     |       |      |      | Ga0222644_1000166 | 3300022841 | Dec 2013_U1_3 µm    | 30,887 |
| <i>Caudovirales</i> | Upper | 3933 | 0.38 | Ga0222650_1000363 | 3300023237 | Jul 2014_U2_3 µm    | 37,577 |
|                     |       |      |      | Ga0222654_1000296 | 3300022836 | Jul 2014_U3_0.8 µm  | 37,577 |
|                     |       |      |      | Ga0222655_1000141 | 3300023245 | Jul 2014_U3_0.1 µm  | 37,577 |
|                     |       |      |      | Ga0222630_1000128 | 3300023243 | Nov 2013_U2_0.8 µm  | 37,509 |
| <i>Caudovirales</i> | Upper | 3945 | 0.53 | Ga0222689_1000107 | 3300023231 | Dec 2014_U3_3 µm    | 46,233 |
| <i>Caudovirales</i> | Upper | 3980 | 0.62 | Ga0222670_1000135 | 3300023294 | Oct 2014_U2_0.1 µm  | 34,523 |
|                     |       |      |      | Ga0222688_1000055 | 3300023293 | Dec 2014_U2_0.1 µm  | 34,523 |
|                     |       |      |      | Ga0222661_1000151 | 3300023229 | Aug 2014_U2_0.1 µm  | 34,520 |
| <i>Caudovirales</i> | Upper | 4928 | 0.38 | Ga0222629_1000080 | 3300022867 | Nov 2013_U2_3 µm    | 37,577 |
| <i>Caudovirales</i> | Upper | 4964 | 0.42 | Ga0222646_100030  | 3300022822 | Dec 2013_U1_0.1 µm  | 61,566 |
| <i>Caudovirales</i> | Upper | 4974 | 0.31 | Ga0222707_1000108 | 3300022832 | 8Jan 2015_U1_0.8 µm | 35,794 |



|                     |       |         |      |                   |            |                      |        |
|---------------------|-------|---------|------|-------------------|------------|----------------------|--------|
|                     |       |         |      | Ga0222708_1000050 | 3300023242 | 8Jan 2015_U1_0.1 µm  | 35,794 |
|                     |       |         |      | Ga0222711_1000050 | 3300022837 | 27Jan 2015_U1_0.1 µm | 35,794 |
| <i>Caudovirales</i> | Upper | 4978    | 0.32 | Ga0222646_100095  | 3300022822 | Dec 2013_U1_0.1 µm   | 31,728 |
| Unknown             | Upper | 5051    | 0.56 | Ga0222691_1000044 | 3300022851 | Dec 2014_U3_0.1 µm   | 59,477 |
| <i>Caudovirales</i> | Upper | 6587    | 0.63 | Ga0222708_1000007 | 3300023242 | 8Jan 2015_U1_0.1 µm  | 76,295 |
| <i>Caudovirales</i> | Upper | 6662    | 0.4  | Ga0222646_100076  | 3300022822 | Dec 2013_U1_0.1 µm   | 36,531 |
| <i>Caudovirales</i> | Upper | 6676    | 0.33 | Ga0222629_1000100 | 3300022867 | Nov 2013_U2_3 µm     | 34,975 |
| <i>Caudovirales</i> | Upper | 6750    | 0.37 | Ga0222664_1000144 | 3300023296 | Aug 2014_U3_0.1 µm   | 55,212 |
| <i>Caudovirales</i> | Upper | 8545    | 0.39 | Ga0208768_1000228 | 3300025601 | Nov 2008_U2_3 µm     | 40,839 |
| <i>Caudovirales</i> | Upper | 9600    | 0.41 | Ga0222689_1000136 | 3300023231 | Dec 2014_U3_3 µm     | 36,717 |
| <i>Caudovirales</i> | Upper | 9840    | 0.59 | Ga0222644_1000101 | 3300022841 | Dec 2013_U1_3 µm     | 44,811 |
| <i>Caudovirales</i> | Upper | 10110   | 0.56 | Ga0222707_1000112 | 3300022832 | 8Jan 2015_U1_0.8 µm  | 35,037 |
| <i>Caudovirales</i> | Upper | 10239   | 0.56 | Ga0222670_1000558 | 3300023294 | Oct 2014_U2_0.1 µm   | 15,420 |
| <i>Caudovirales</i> | Upper | sg_8813 | 0.51 | Ga0222646_100052  | 3300022822 | Dec 2013_U1_0.1 µm   | 44,962 |
| <i>Caudovirales</i> | Upper | sg_8814 | 0.59 | Ga0222646_100054  | 3300022822 | Dec 2013_U1_0.1 µm   | 44,811 |
| <i>Caudovirales</i> | Upper | sg_8907 | 0.59 | Ga0222645_100134  | 3300022833 | Dec 2013_U1_0.8 µm   | 44,811 |
| Unknown             | Upper | sg_9264 | 0.53 | Ga0222691_1000034 | 3300022851 | Dec 2014_U3_0.1 µm   | 68,930 |
| <i>Caudovirales</i> | Upper | sg_9323 | 0.62 | Ga0222652_1000161 | 3300022853 | Jul 2014_U2_0.1 µm   | 34,523 |
| <i>Caudovirales</i> | Upper | sg_9693 | 0.48 | Ga0222662_1000451 | 3300022885 | Aug 2014_U3_3 µm     | 33,379 |
| Unknown             | Upper |         | 0.55 | Ga0222634_1000134 | 3300023235 | Nov 2013_U3_0.1 µm   | 43,608 |

|                     |       |  |          |                   |            |                    |        |
|---------------------|-------|--|----------|-------------------|------------|--------------------|--------|
| <i>Caudovirales</i> | Upper |  | 0.29     | Ga0222629_1000190 | 3300022867 | Nov 2013_U2_3 µm   | 23,953 |
|                     |       |  |          | Ga0222630_1000353 | 3300023243 | Nov 2013_U2_0.8 µm | 23,953 |
|                     |       |  |          | Ga0222649_1000173 | 3300022839 | Feb 2014_U1_0.1 µm | 23,953 |
|                     |       |  |          | Ga0222650_1000687 | 3300023237 | Jul 2014_U2_3 µm   | 23,953 |
|                     |       |  |          | Ga0222652_1000292 | 3300022853 | Jul 2014_U2_0.1 µm | 23,953 |
|                     |       |  |          | Ga0222655_1000302 | 3300023245 | Jul 2014_U3_0.1 µm | 23,953 |
|                     |       |  |          | Ga0222661_1000259 | 3300023229 | Aug 2014_U2_0.1 µm | 23,953 |
|                     |       |  |          | Ga0222670_1000261 | 3300023294 | Oct 2014_U2_0.1 µm | 23,953 |
|                     |       |  |          | Ga0222676_1000205 | 3300023240 | Oct 2014_U3_0.1 µm | 23,953 |
| <i>Retrovirales</i> | Upper |  | 0.52     | Ga0222647_1001013 | 3300022827 | Feb 2014_U1_3 µm   | 9,276  |
| <i>Microviridae</i> | Upper |  | 0.49     | Ga0222662_1004683 | 3300022885 | Aug 2014_U3_3 µm   | 4,292  |
|                     |       |  |          | Ga0222663_1002047 | 3300022845 | Aug 2014_U3_0.8 µm | 4,292  |
|                     |       |  |          | Ga0222675_1003300 | 3300023238 | Oct 2014_U3_0.8 µm | 4,292  |
|                     |       |  |          | Ga0222690_1001523 | 3300023227 | Dec 2014_U3_0.8 µm | 4,292  |
| CressDNAParvo       | Upper |  | 0.5      | Ga0222633_1005399 | 3300022847 | Nov 2013_U3_0.8 µm | 3,562  |
| CressDNAParvo       | Upper |  | 0.49     | Ga0222648_1005368 | 3300023054 | Feb 2014_U1_0.8 µm | 3,536  |
| CressDNAParvo       | Upper |  | 0.51     | Ga0222645_105175  | 3300022833 | Dec 2013_U1_0.8 µm | 3,122  |
| CressDNAParvo       | Upper |  | 0.5      | Ga0222630_1006513 | 3300023243 | Nov 2013_U2_0.8 µm | 3,115  |
| CressDNAParvo       | Upper |  | 0.49-0.5 | Ga0222633_1006260 | 3300022847 | Nov 2013_U3_0.8 µm | 3,081  |
|                     |       |  |          | Ga0222644_1002881 | 3300022841 | Dec 2013_U1_3 µm   | 3,081  |

|                     |                     |      |           |                   |            |                      |        |
|---------------------|---------------------|------|-----------|-------------------|------------|----------------------|--------|
|                     |                     |      |           | Ga0222645_105245  | 3300022833 | Dec 2013_U1_0.8 µm   | 3,081  |
| CressDNAParvo       | Upper               |      | 0.39      | Ga0208413_1024040 | 3300025513 | Nov 2008_U2_0.8 µm   | 2,137  |
|                     |                     |      |           | Ga0208768_1018460 | 3300025601 | Nov 2008_U2_3 µm     | 2,137  |
|                     |                     |      |           | Ga0222648_1012621 | 3300023054 | Feb 2014_U1_0.8 µm   | 2,137  |
|                     |                     |      |           | Ga0222668_1009307 | 3300022865 | Oct 2014_U2_3 µm     | 2,137  |
|                     |                     |      |           | Ga0222707_1004304 | 3300022832 | 8Jan 2015_U1_0.8 µm  | 2,137  |
|                     |                     |      |           | Ga0222710_1007623 | 3300023429 | 27Jan 2015_U1_0.8 µm | 2,137  |
|                     |                     |      |           | Ga0222644_1005372 | 3300022841 | Dec 2013_U1_3 µm     | 2,074  |
| Unknown             | Upper               |      | 0.47-0.48 | Ga0222686_1006371 | 3300023501 | Dec 2014_U2_3 µm     | 2,033  |
|                     |                     |      |           | Ga0222687_1009818 | 3300022844 | Dec 2014_U2_0.8 µm   | 2,033  |
|                     |                     |      |           | Ga0222690_1005126 | 3300023227 | Dec 2014_U3_0.8 µm   | 2,033  |
| <i>Caudovirales</i> | Upper,<br>Interface | 711  | 0.61      | Ga0208414_1000366 | 3300025603 | Nov 2008_U3_0.8 µm   | 48,437 |
|                     |                     |      |           | Ga0208770_1000171 | 3300025438 | Nov 2008_U3_0.1 µm   | 48,437 |
|                     |                     |      |           | Ga0208903_1000269 | 3300025502 | Nov 2008_U3_3 µm     | 48,437 |
|                     |                     |      |           | Ga0222673_1000112 | 3300022821 | Oct 2014_I_0.1 µm    | 48,437 |
| <i>Caudovirales</i> | Upper,<br>Interface | 1926 | 0.42      | Ga0222631_1000047 | 3300022843 | Nov 2013_U2_0.1 µm   | 35,853 |
|                     |                     |      |           | Ga0222634_1000201 | 3300023235 | Nov 2013_U3_0.1 µm   | 35,853 |
|                     |                     |      |           | Ga0222664_1000276 | 3300023296 | Aug 2014_U3_0.1 µm   | 35,853 |
|                     |                     |      |           | Ga0222676_1000105 | 3300023240 | Oct 2014_U3_0.1 µm   | 35,853 |
|                     |                     |      |           | Ga0222691_1000108 | 3300022851 | Dec 2014_U3_0.1 µm   | 35,853 |

|                     |                     |      |      |                   |            |                    |         |
|---------------------|---------------------|------|------|-------------------|------------|--------------------|---------|
| <i>Caudovirales</i> | Upper,<br>Interface | 5848 | 0.41 | Ga0222671_1000145 | 3300022856 | Oct 2014_I_3 µm    | 36,717  |
|                     |                     |      |      | Ga0222674_1000135 | 3300022848 | Oct 2014_U3_3 µm   | 36,717  |
| <i>Caudovirales</i> | Interface           | 169  | 0.52 | Ga0222673_1000089 | 3300022821 | Oct 2014_I_0.1 µm  | 56,215  |
| <i>Caudovirales</i> | Interface           | 388  | 0.39 | Ga0222667_1000128 | 3300022890 | Aug 2014_I_0.1 µm  | 43,076  |
| <i>Caudovirales</i> | Interface           | 735  | 0.34 | Ga0222628_1000134 | 3300022871 | Nov 2013_I_0.1 µm  | 37,031  |
| <i>Caudovirales</i> | Interface           | 868  | 0.39 | Ga0222658_1000119 | 3300023257 | Jul 2014_I_0.1 µm  | 49,083  |
|                     |                     |      |      | Ga0222667_1000096 | 3300022890 | Aug 2014_I_0.1 µm  | 49,083  |
| <i>Caudovirales</i> | Interface           | 1230 | 0.39 | Ga0222664_1000178 | 3300023296 | Aug 2014_U3_0.1 µm | 47,643  |
|                     |                     |      |      | Ga0222673_1000118 | 3300022821 | Oct 2014_I_0.1 µm  | 47,643  |
| <i>Caudovirales</i> | Interface           | 1480 | 0.53 | Ga0222665_1000014 | 3300022864 | Aug 2014_I_3 µm    | 116,028 |
| <i>Caudovirales</i> | Interface           | 2193 | 0.46 | Ga0222666_1000279 | 3300024048 | Aug 2014_I_0.8 µm  | 34,155  |
| <i>Caudovirales</i> | Interface           | 2653 | 0.34 | Ga0222673_1000073 | 3300022821 | Oct 2014_I_0.1 µm  | 62,977  |
| <i>Caudovirales</i> | Interface           | 2987 | 0.42 | Ga0222667_1000147 | 3300022890 | Aug 2014_I_0.1 µm  | 40,847  |
| <i>Caudovirales</i> | Interface           | 3162 | 0.58 | Ga0222676_1000050 | 3300023240 | Oct 2014_U3_0.1 µm | 57,415  |
| <i>Caudovirales</i> | Interface           | 3886 | 0.33 | Ga0222628_1000116 | 3300022871 | Nov 2013_I_0.1 µm  | 39,121  |
| <i>Caudovirales</i> | Interface           | 3903 | 0.3  | Ga0222628_1000072 | 3300022871 | Nov 2013_I_0.1 µm  | 49,428  |
| <i>Caudovirales</i> | Interface           | 4460 | 0.3  | Ga0208647_1000090 | 3300025362 | Nov 2008_I_0.1 µm  | 39,252  |
|                     |                     |      |      | Ga0208901_1000202 | 3300025380 | Nov 2008_I_0.8 µm  | 39,252  |
| <i>Caudovirales</i> | Interface           | 4998 | 0.36 | Ga0222694_1000023 | 3300023292 | Dec 2014_I_0.1 µm  | 46,925  |
| <i>Caudovirales</i> | Interface           | 6611 | 0.41 | Ga0222673_1000151 | 3300022821 | Oct 2014_I_0.1 µm  | 41,192  |

|                     |                     |          |      |                   |            |                    |        |
|---------------------|---------------------|----------|------|-------------------|------------|--------------------|--------|
| <i>Caudovirales</i> | Interface           | 6749     | 0.59 | Ga0222673_1000068 | 3300022821 | Oct 2014_I_0.1 µm  | 64,142 |
| <i>Caudovirales</i> | Interface           | 8415     | 0.31 | Ga0222671_1000142 | 3300022856 | Oct 2014_I_3 µm    | 37,783 |
| <i>Caudovirales</i> | Interface           | 8461     | 0.4  | Ga0208647_1000095 | 3300025362 | Nov 2008_I_0.1 µm  | 38,594 |
| <i>Caudovirales</i> | Interface           | 8535     | 0.52 | Ga0208900_1000079 | 3300025433 | Nov 2008_I_3 µm    | 57,510 |
| Unknown             | Interface           | sg_10466 | 0.31 | Ga0222694_1000048 | 3300023292 | Dec 2014_I_0.1 µm  | 35,253 |
| <i>Caudovirales</i> | Interface           | sg_8715  | 0.34 | Ga0222673_1000129 | 3300022821 | Oct 2014_I_0.1 µm  | 45,604 |
| <i>Caudovirales</i> | Interface,<br>Lower | 116      | 0.31 | Ga0222626_1000295 | 3300022882 | Nov 2013_I_3 µm    | 32,335 |
|                     |                     |          |      | Ga0222657_1000246 | 3300023241 | Jul 2014_I_0.8 µm  | 32,281 |
|                     |                     |          |      | Ga0222696_1000266 | 3300023233 | Dec 2014_L1_0.8 µm | 32,200 |
| <i>Caudovirales</i> | Interface,<br>Lower | 540      | 0.34 | Ga0222637_1000124 | 3300023435 | Nov 2013_L1_0.1 µm | 42,243 |
|                     |                     |          |      | Ga0222667_1000132 | 3300022890 | Aug 2014_I_0.1 µm  | 42,243 |
|                     |                     |          |      | Ga0222697_1000106 | 3300022868 | Dec 2014_L1_0.1 µm | 42,243 |
| <i>Caudovirales</i> | Interface,<br>Lower | 714      | 0.32 | Ga0208904_1000360 | 3300025669 | Nov 2008_L2_0.1 µm | 39,410 |
|                     |                     |          |      | Ga0222628_1000114 | 3300022871 | Nov 2013_I_0.1 µm  | 39,366 |
|                     |                     |          |      | Ga0222664_1000244 | 3300023296 | Aug 2014_U3_0.1 µm | 39,366 |
|                     |                     |          |      | Ga0222667_1000156 | 3300022890 | Aug 2014_I_0.1 µm  | 39,366 |
|                     |                     |          |      | Ga0222697_1000123 | 3300022868 | Dec 2014_L1_0.1 µm | 39,366 |
|                     |                     |          |      | Ga0222637_1000143 | 3300023435 | Nov 2013_L1_0.1 µm | 39,308 |
|                     |                     |          |      | Ga0222694_1000034 | 3300023292 | Dec 2014_I_0.1 µm  | 39,294 |
| <i>Caudovirales</i> | Interface,          | 738      | 0.38 | Ga0208904_1000278 | 3300025669 | Nov 2008_L2_0.1 µm | 44,769 |

|                     |                     |      |           |                   |            |                    |        |
|---------------------|---------------------|------|-----------|-------------------|------------|--------------------|--------|
|                     | Lower               |      |           | Ga0222637_1000115 | 3300023435 | Nov 2013_L1_0.1 µm | 43,214 |
|                     |                     |      |           | Ga0222658_1000155 | 3300023257 | Jul 2014_I_0.1 µm  | 43,214 |
|                     |                     |      |           | Ga0222667_1000127 | 3300022890 | Aug 2014_I_0.1 µm  | 43,214 |
|                     |                     |      |           | Ga0222679_1000066 | 3300022858 | Oct 2014_L1_0.1 µm | 43,214 |
|                     |                     |      |           | Ga0222697_1000099 | 3300022868 | Dec 2014_L1_0.1 µm | 43,214 |
| <i>Caudovirales</i> | Interface,<br>Lower | 753  | 0.34      | Ga0222657_1000100 | 3300023241 | Jul 2014_I_0.8 µm  | 63,847 |
|                     |                     |      |           | Ga0222658_1000072 | 3300023257 | Jul 2014_I_0.1 µm  | 63,847 |
|                     |                     |      |           | Ga0222667_1000072 | 3300022890 | Aug 2014_I_0.1 µm  | 63,847 |
|                     |                     |      |           | Ga0222673_1000070 | 3300022821 | Oct 2014_I_0.1 µm  | 63,847 |
|                     |                     |      |           | Ga0222694_1000013 | 3300023292 | Dec 2014_I_0.1 µm  | 63,847 |
|                     |                     |      |           | Ga0222697_1000052 | 3300022868 | Dec 2014_L1_0.1 µm | 63,847 |
| <i>Caudovirales</i> | Interface,<br>Lower | 782  | 0.31-0.33 | Ga0222658_1000118 | 3300023257 | Jul 2014_I_0.1 µm  | 49,360 |
|                     |                     |      |           | Ga0208647_1000101 | 3300025362 | Nov 2008_I_0.1 µm  | 37,783 |
|                     |                     |      |           | Ga0208904_1000394 | 3300025669 | Nov 2008_L2_0.1 µm | 37,783 |
|                     |                     |      |           | Ga0222673_1000179 | 3300022821 | Oct 2014_I_0.1 µm  | 37,783 |
|                     |                     |      |           | Ga0222697_1000133 | 3300022868 | Dec 2014_L1_0.1 µm | 37,783 |
| <i>Caudovirales</i> | Interface,<br>Lower | 1928 | 0.4       | Ga0222628_1000130 | 3300022871 | Nov 2013_I_0.1 µm  | 37,186 |
|                     |                     |      |           | Ga0222637_1000162 | 3300023435 | Nov 2013_L1_0.1 µm | 37,186 |
|                     |                     |      |           | Ga0222667_1000169 | 3300022890 | Aug 2014_I_0.1 µm  | 37,186 |
|                     |                     |      |           | Ga0222679_1000092 | 3300022858 | Oct 2014_L1_0.1 µm | 37,186 |

|                     |                     |      |      |                   |            |                    |         |
|---------------------|---------------------|------|------|-------------------|------------|--------------------|---------|
|                     |                     |      |      | Ga0222697_1000138 | 3300022868 | Dec 2014_L1_0.1 µm | 37,186  |
| <i>Caudovirales</i> | Interface,<br>Lower | 2172 | 0.41 | Ga0208904_1000242 | 3300025669 | Nov 2008_L2_0.1 µm | 47,696  |
|                     |                     |      |      | Ga0222658_1000126 | 3300023257 | Jul 2014_I_0.1 µm  | 47,696  |
| <i>Caudovirales</i> | Interface,<br>Lower |      | 0.39 | Ga0222626_1000161 | 3300022882 | Nov 2013_I_3 µm    | 47,710  |
|                     |                     |      |      | Ga0222627_1000111 | 3300023244 | Nov 2013_I_0.8 µm  | 47,710  |
|                     |                     |      |      | Ga0222636_1000113 | 3300022854 | Nov 2013_L1_0.8 µm | 47,710  |
|                     |                     |      |      | Ga0222666_1000189 | 3300024048 | Aug 2014_I_0.8 µm  | 47,710  |
|                     |                     |      |      | Ga0222667_1000103 | 3300022890 | Aug 2014_I_0.1 µm  | 47,710  |
|                     |                     |      |      | Ga0222696_1000167 | 3300023233 | Dec 2014_L1_0.8 µm | 47,710  |
| <i>Caudovirales</i> | Lower               | 24   | 0.56 | Ga0208769_1000001 | 3300025697 | Nov 2008_L1_0.1 µm | 528,260 |
|                     |                     |      |      | Ga0222679_1000001 | 3300022858 | Oct 2014_L1_0.1 µm | 528,258 |
|                     |                     |      |      | Ga0222682_1000001 | 3300023246 | Oct 2014_L2_0.1 µm | 528,256 |
| <i>Caudovirales</i> | Lower               | 82   | 0.51 | Ga0222635_1000049 | 3300023234 | Nov 2013_L1_3 µm   | 65,245  |
| <i>Caudovirales</i> | Lower               | 113  | 0.4  | Ga0208769_1000003 | 3300025697 | Nov 2008_L1_0.1 µm | 185,273 |
|                     |                     |      |      | Ga0208771_1000009 | 3300025698 | Nov 2008_L3_3 µm   | 185,273 |
|                     |                     |      |      | Ga0208905_1000005 | 3300025661 | Nov 2008_L3_0.8 µm | 185,273 |
| <i>Caudovirales</i> | Lower               | 205  | 0.4  | Ga0207996_1000318 | 3300025586 | Nov 2008_L2_0.8 µm | 44,112  |
|                     |                     |      |      | Ga0208648_1000425 | 3300025642 | Nov 2008_L2_3 µm   | 44,112  |
| <i>Caudovirales</i> | Lower               | 311  | 0.44 | Ga0208902_1000117 | 3300025628 | Nov 2008_L1_0.8 µm | 48,707  |
|                     |                     |      |      | Ga0208279_1000257 | 3300025649 | Nov 2008_L1_3 µm   | 48,534  |

|                     |       |      |      |                   |            |                    |        |
|---------------------|-------|------|------|-------------------|------------|--------------------|--------|
| <i>Caudovirales</i> | Lower | 740  | 0.36 | Ga0208771_1000154 | 3300025698 | Nov 2008_L3_3 µm   | 43,313 |
| <i>Caudovirales</i> | Lower | 866  | 0.55 | Ga0208904_1000201 | 3300025669 | Nov 2008_L2_0.1 µm | 51,617 |
|                     |       |      |      | Ga0222640_1000018 | 3300023297 | Nov 2013_L2_0.1 µm | 51,617 |
|                     |       |      |      | Ga0222679_1000040 | 3300022858 | Oct 2014_L1_0.1 µm | 51,617 |
| <i>Caudovirales</i> | Lower | 872  | 0.31 | Ga0222696_1000206 | 3300023233 | Dec 2014_L1_0.8 µm | 40,169 |
| <i>Caudovirales</i> | Lower | 914  | 0.39 | Ga0208904_1000193 | 3300025669 | Nov 2008_L2_0.1 µm | 52,303 |
|                     |       |      |      | Ga0222679_1000038 | 3300022858 | Oct 2014_L1_0.1 µm | 52,303 |
| <i>Caudovirales</i> | Lower | 1040 | 0.42 | Ga0208769_1000193 | 3300025697 | Nov 2008_L1_0.1 µm | 32,656 |
| <i>Caudovirales</i> | Lower | 1137 | 0.35 | Ga0207996_1000364 | 3300025586 | Nov 2008_L2_0.8 µm | 41,358 |
| <i>Caudovirales</i> | Lower | 1152 | 0.36 | Ga0222685_1000017 | 3300022874 | Oct 2014_L3_0.1 µm | 36,298 |
| <i>Caudovirales</i> | Lower | 1153 | 0.36 | Ga0208769_1000085 | 3300025697 | Nov 2008_L1_0.1 µm | 44,334 |
| <i>Caudovirales</i> | Lower | 1270 | 0.31 | Ga0222637_1000055 | 3300023435 | Nov 2013_L1_0.1 µm | 59,445 |
| <i>Caudovirales</i> | Lower | 1274 | 0.51 | Ga0208769_1000038 | 3300025697 | Nov 2008_L1_0.1 µm | 68,986 |
| <i>Caudovirales</i> | Lower | 1424 | 0.34 | Ga0208905_1000064 | 3300025661 | Nov 2008_L3_0.8 µm | 51,499 |
| <i>Caudovirales</i> | Lower | 1429 | 0.34 | Ga0208771_1000215 | 3300025698 | Nov 2008_L3_3 µm   | 36,811 |
|                     |       |      |      | Ga0208905_1000127 | 3300025661 | Nov 2008_L3_0.8 µm | 36,811 |
| <i>Caudovirales</i> | Lower | 1640 | 0.4  | Ga0208904_1000412 | 3300025669 | Nov 2008_L2_0.1 µm | 36,601 |
| <i>Caudovirales</i> | Lower | 1869 | 0.39 | Ga0222637_1000130 | 3300023435 | Nov 2013_L1_0.1 µm | 41,872 |
|                     |       |      |      | Ga0208904_1000324 | 3300025669 | Nov 2008_L2_0.1 µm | 41,796 |
| <i>Caudovirales</i> | Lower | 1870 | 0.39 | Ga0222637_1000047 | 3300023435 | Nov 2013_L1_0.1 µm | 65,207 |



|                     |       |      |      |                    |            |                    |        |
|---------------------|-------|------|------|--------------------|------------|--------------------|--------|
| <i>Caudovirales</i> | Lower | 1875 | 0.41 | Ga0208769_1000105  | 3300025697 | Nov 2008_L1_0.1 µm | 42,085 |
| <i>Caudovirales</i> | Lower | 1882 | 0.39 | Ga0208769_1000053  | 3300025697 | Nov 2008_L1_0.1 µm | 58,972 |
| <i>Caudovirales</i> | Lower | 2151 | 0.36 | Ga0208771_1001592  | 3300025698 | Nov 2008_L3_3 µm   | 11,801 |
|                     |       |      |      | Ga0208905_1001478  | 3300025661 | Nov 2008_L3_0.8 µm | 11,801 |
|                     |       |      |      | Ga0307928_10003616 | 3300031227 | Nov 2013_L3_0.1 µm | 11,801 |
| <i>Caudovirales</i> | Lower | 2535 | 0.39 | Ga0222679_1000074  | 3300022858 | Oct 2014_L1_0.1 µm | 41,354 |
| <i>Caudovirales</i> | Lower | 2539 | 0.32 | Ga0222697_1000080  | 3300022868 | Dec 2014_L1_0.1 µm | 48,241 |
| Unknown             | Lower | 2543 | 0.34 | Ga0207997_1000146  | 3300025736 | Nov 2008_L3_0.1 µm | 33,354 |
| <i>Caudovirales</i> | Lower | 2955 | 0.42 | Ga0208648_1000482  | 3300025642 | Nov 2008_L2_3 µm   | 40,949 |
|                     |       |      |      | Ga0207996_1000375  | 3300025586 | Nov 2008_L2_0.8 µm | 40,946 |
| <i>Caudovirales</i> | Lower | 4777 | 0.33 | Ga0307928_10000216 | 3300031227 | Nov 2013_L3_0.1 µm | 40,506 |
| <i>Caudovirales</i> | Lower | 6083 | 0.56 | Ga0208904_1000262  | 3300025669 | Nov 2008_L2_0.1 µm | 46,043 |
| <i>Caudovirales</i> | Lower | 6100 | 0.42 | Ga0208904_1000286  | 3300025669 | Nov 2008_L2_0.1 µm | 43,985 |
| <i>Caudovirales</i> | Lower | 6184 | 0.49 | Ga0307928_10000238 | 3300031227 | Nov 2013_L3_0.1 µm | 39,571 |
| <i>Caudovirales</i> | Lower | 6251 | 0.31 | Ga0307928_10000150 | 3300031227 | Nov 2013_L3_0.1 µm | 44,919 |
| <i>Caudovirales</i> | Lower | 6647 | 0.36 | Ga0307928_10000232 | 3300031227 | Nov 2013_L3_0.1 µm | 39,766 |
| <i>Caudovirales</i> | Upper | 8417 | 0.32 | Ga0222634_1000217  | 3300023235 | Nov 2013_U3_0.1 µm | 33,882 |
| <i>Caudovirales</i> | Lower | 8655 | 0.4  | Ga0208902_1000132  | 3300025628 | Nov 2008_L1_0.8 µm | 46,752 |
| <i>Caudovirales</i> | Lower | 8662 | 0.48 | Ga0208648_1000620  | 3300025642 | Nov 2008_L2_3 µm   | 34,039 |
| <i>Caudovirales</i> | Lower | 9532 | 0.54 | Ga0307928_10000040 | 3300031227 | Nov 2013_L3_0.1 µm | 67,356 |

|                     |       |          |      |                    |            |                    |        |
|---------------------|-------|----------|------|--------------------|------------|--------------------|--------|
| <i>Caudovirales</i> | Lower | 10290    | 0.34 | Ga0222679_1000185  | 3300022858 | Oct 2014_L1_0.1 µm | 25,884 |
|                     |       |          |      | Ga0222637_1000264  | 3300023435 | Nov 2013_L1_0.1 µm | 25,839 |
| Unknown             | Lower | sg_10366 | 0.34 | Ga0222703_1000045  | 3300023256 | Dec 2014_L3_0.1 µm | 33,260 |
| <i>Caudovirales</i> | Lower | sg_11172 | 0.35 | Ga0307928_10003248 | 3300031227 | Nov 2013_L3_0.1 µm | 12,412 |
| <i>Caudovirales</i> | Lower | sg_11648 | 0.56 | Ga0307928_10000234 | 3300031227 | Nov 2013_L3_0.1 µm | 39,713 |
| <i>Caudovirales</i> | Lower | sg_2     | 0.6  | Ga0222636_1000107  | 3300022854 | Nov 2013_L1_0.8 µm | 48,758 |
| <i>Caudovirales</i> | Lower | sg_550   | 0.39 | Ga0208904_1000255  | 3300025669 | Nov 2008_L2_0.1 µm | 46,474 |
| <i>Caudovirales</i> | Lower | sg_576   | 0.39 | Ga0208904_1000272  | 3300025669 | Nov 2008_L2_0.1 µm | 45,040 |
| <i>Caudovirales</i> | Lower | sg_637   | 0.31 | Ga0208904_1000246  | 3300025669 | Nov 2008_L2_0.1 µm | 47,285 |
| <i>Caudovirales</i> | Lower | sg_9367  | 0.32 | Ga0222679_1000111  | 3300022858 | Oct 2014_L1_0.1 µm | 34,677 |
| <i>Caudovirales</i> | Lower |          | 0.37 | Ga0207997_1000112  | 3300025736 | Nov 2008_L3_0.1 µm | 37,866 |
|                     |       |          |      | Ga0307928_10000272 | 3300031227 | Nov 2013_L3_0.1 µm | 37,866 |
| <i>Caudovirales</i> | Lower |          | 0.31 | Ga0222640_1000087  | 3300023297 | Nov 2013_L2_0.1 µm | 31,376 |
| <i>Caudovirales</i> | Lower |          | 0.35 | Ga0207997_1000616  | 3300025736 | Nov 2008_L3_0.1 µm | 18,059 |
| <i>Caudovirales</i> | Lower |          | 0.41 | Ga0207997_1001313  | 3300025736 | Nov 2008_L3_0.1 µm | 12,882 |
|                     |       |          |      | Ga0307928_10003015 | 3300031227 | Nov 2013_L3_0.1 µm | 12,882 |
| <i>Caudovirales</i> | Lower |          | 0.43 | Ga0307928_10003459 | 3300031227 | Nov 2013_L3_0.1 µm | 12,048 |
| <i>Caudovirales</i> | Lower |          | 0.35 | Ga0222697_1000929  | 3300022868 | Dec 2014_L1_0.1 µm | 11,901 |
| <i>Caudovirales</i> | Lower |          | 0.44 | Ga0207997_1001542  | 3300025736 | Nov 2008_L3_0.1 µm | 11,831 |

<sup>A</sup> A total of 337 contigs representing complete, circular virus genomes were assigned virus clades. Based on their GC content, length, virus cluster and alignment, they were classified into 173 distinct viruses (all shown here). The virus clades are: *Caudovirales* (158); *Microviridae* (1); *Retrovirales* (1); Cress-DNA virus/Parvovirus (6); unknown (7). Viruses belonging to *Microviridae*, *Retrovirales* and Cress-DNA virus/Parvovirus were detected only in the upper

zone, suggesting a wider variety of viruses were supported in the photic zone. <sup>B</sup> Cluster assignments based on clustering with the IMG/VR viral database (see **Methods: Viral analyses**). <sup>C</sup> Ace Lake metagenomes from which virus contigs were identified. Depths: U1, upper 1; U2, upper 2; U3, upper 3; I, interface; L1, lower 1; L2, lower 2; L3, lower 3. Filter fractions: 3, 20–3  $\mu\text{m}$ ; 0.8, 3–0.8  $\mu\text{m}$ ; 0.1, 0.8–0.1  $\mu\text{m}$ . The viral genome contigs highlighted in red belong to cluster 24 (see Additional file 4: Table S10).

**Table S2** Summary of the virus and NCLDV clusters, singletons and contigs associated with *Phycodnaviridae* 1-5 OTUs.

| Virus OTUs               | Matches to the Ace Lake virus catalog |                                                               | Matches to the Ace Lake NCLDV catalog |                                                               | NCLDV clusters unique to an OTU |
|--------------------------|---------------------------------------|---------------------------------------------------------------|---------------------------------------|---------------------------------------------------------------|---------------------------------|
|                          | Number of contigs                     | Number of clusters and singletons to which the contigs belong | Number of contigs                     | Number of clusters and singletons to which the contigs belong |                                 |
| <i>Phycodnaviridae</i> 1 | 377                                   | 25                                                            | 231                                   | 15                                                            | 8                               |
| <i>Phycodnaviridae</i> 2 | 1982                                  | 141                                                           | 889                                   | 65                                                            | 54                              |
| <i>Phycodnaviridae</i> 3 | 510                                   | 175                                                           | 80                                    | 17                                                            | All                             |
| <i>Phycodnaviridae</i> 4 | 315                                   | 46                                                            | 129                                   | 12                                                            | 5                               |
| <i>Phycodnaviridae</i> 5 | 68                                    | 16                                                            | 30                                    | 5                                                             | None                            |

NCLDV, nucleocytoplasmic large DNA virus; OTU, operational taxonomic unit.

**Table S3** Relative abundance-based correlation between *Micromonas* and *Phycodnaviridae* 1-5 OTUs.

| Organism 1               | Organism 2               | 20-3 µm filter fraction |         | 3-0.8 µm filter fraction |         | 0.8-0.1 µm filter fraction* |         |
|--------------------------|--------------------------|-------------------------|---------|--------------------------|---------|-----------------------------|---------|
|                          |                          | Coefficient             | P-value | Coefficient              | P-value | Coefficient                 | P-value |
| Micromonas               | <i>Phycodnaviridae</i> 1 | -0.3                    | 0.2     | -0.3                     | 0.3     | NC                          | NC      |
| Micromonas               | <i>Phycodnaviridae</i> 2 | -0.1                    | 0.6     | -0.4                     | 0.1     | NC                          | NC      |
| Micromonas               | <i>Phycodnaviridae</i> 3 | 0.1                     | 0.9     | -0.3                     | 0.3     | NC                          | NC      |
| Micromonas               | <i>Phycodnaviridae</i> 4 | -0.2                    | 0.4     | -0.2                     | 0.4     | NC                          | NC      |
| Micromonas               | <i>Phycodnaviridae</i> 5 | -0.2                    | 0.5     | -0.4                     | 0.1     | NC                          | NC      |
|                          |                          |                         |         |                          |         |                             |         |
| <i>Phycodnaviridae</i> 1 | <i>Phycodnaviridae</i> 2 | 0.8                     | 0.0004  | 0.6                      | 0.01    | 0.5                         | 0.03    |
| <i>Phycodnaviridae</i> 1 | <i>Phycodnaviridae</i> 3 | -0.1                    | 0.8     | -0.2                     | 0.5     | -0.1                        | 0.7     |
| <i>Phycodnaviridae</i> 1 | <i>Phycodnaviridae</i> 4 | 0.9                     | 2E-7    | 0.7                      | 0.002   | 0.7                         | 0.001   |
| <i>Phycodnaviridae</i> 1 | <i>Phycodnaviridae</i> 5 | 0.7                     | 0.0005  | 0.7                      | 0.003   | 0.5                         | 0.2     |
|                          |                          |                         |         |                          |         |                             |         |
| <i>Phycodnaviridae</i> 2 | <i>Phycodnaviridae</i> 3 | 0.4                     | 0.1     | 0.2                      | 0.6     | 0.5                         | 0.04    |
| <i>Phycodnaviridae</i> 2 | <i>Phycodnaviridae</i> 4 | 0.8                     | 4E-5    | 0.9                      | 3E-7    | 0.7                         | 0.001   |
| <i>Phycodnaviridae</i> 2 | <i>Phycodnaviridae</i> 5 | 0.9                     | 2E-8    | 0.9                      | 5E-9    | 0.96                        | 3E-10   |
|                          |                          |                         |         |                          |         |                             |         |
| <i>Phycodnaviridae</i> 3 | <i>Phycodnaviridae</i> 4 | 0.2                     | 0.5     | 0.1                      | 0.7     | 0.2                         | 0.6     |
| <i>Phycodnaviridae</i> 3 | <i>Phycodnaviridae</i> 5 | 0.4                     | 0.1     | -0.01                    | 1       | 0.5                         | 0.04    |
|                          |                          |                         |         |                          |         |                             |         |
| <i>Phycodnaviridae</i> 4 | <i>Phycodnaviridae</i> 5 | 0.8                     | 3E-5    | 0.9                      | 4E-8    | 0.7                         | 0.002   |

The Pearson product moment correlation coefficient was used to assess the correlation. The significance of the correlation was established with ANOVA (analysis of variance) regression analysis. \* The correlation between *Micromonas* and *Phycodnaviridae* 1-5 was not calculated (NC) in the metagenomes from the 0.8-0.1 µm filter fraction because *Micromonas* was not detected in this size fraction. Correlation coefficients that are significant at 99% confidence level have been highlighted with a grey background.

**Table S4** Ace Lake cyanophage metadata.

| Contig ID                                               | Taxon ID   | Given name     | Sample collection date | Filter fraction | Ace Lake zone | Length | GC content | Read depth | Taxonomy*                         |
|---------------------------------------------------------|------------|----------------|------------------------|-----------------|---------------|--------|------------|------------|-----------------------------------|
| Cyanophage hits from 120 Ace Lake metagenomes           |            |                |                        |                 |               |        |            |            |                                   |
| Ga0222688_1000631                                       | 3300023293 | CL6727_D14     | Dec-14                 | 0.8-0.1 µm      | Upper 1       | 7780   | 0.27       | 9          | Unclassified                      |
| Ga0222688_1000642                                       | 3300023293 | CL6580_D14     | Dec-14                 | 0.8-0.1 µm      | Upper 1       | 7681   | 0.27       | 9          | Unclassified                      |
| Ga0302066_100481                                        | 3300028222 | CL9495_D6      | Dec-06                 | 0.8-0.1 µm      | Upper 2       | 6313   | 0.29       | 4          | Unclassified                      |
| Ga0302071_100018                                        | 3300028228 | CL6580_D6      | Dec-06                 | 0.8-0.1 µm      | Upper 1       | 51665  | 0.29       | 9          | Unclassified                      |
| Ga0302071_100023                                        | 3300028228 | CL6727_D6      | Dec-06                 | 0.8-0.1 µm      | Upper 1       | 43753  | 0.28       | 10         | Unclassified                      |
| Ga0302071_100029                                        | 3300028228 | SG14971_D6     | Dec-06                 | 0.8-0.1 µm      | Upper 1       | 41278  | 0.28       | 14         | Unclassified                      |
| Ga0302071_100139                                        | 3300028228 | SG15003_D6     | Dec-06                 | 0.8-0.1 µm      | Upper 1       | 19294  | 0.29       | 10         | Unclassified                      |
| Ga0302071_100165                                        | 3300028228 | CL9892_D6      | Dec-06                 | 0.8-0.1 µm      | Upper 1       | 17793  | 0.26       | 9          | Unclassified                      |
| Ga0302071_100180                                        | 3300028228 | SG14969_D6     | Dec-06                 | 0.8-0.1 µm      | Upper 1       | 16925  | 0.28       | 9          | Unclassified                      |
| Ga0302071_100224                                        | 3300028228 | SG14949_D6     | Dec-06                 | 0.8-0.1 µm      | Upper 1       | 14834  | 0.27       | 10         | <i>Algoriphagus resistens</i>     |
| Ga0302071_100266                                        | 3300028228 | SG14929_D6     | Dec-06                 | 0.8-0.1 µm      | Upper 1       | 13303  | 0.3        | 11         | Enterobacteria phage vB_KleM-RaK2 |
| Cyanophage hits from Ace Lake metaBAT2 co-assembly MAGs |            |                |                        |                 |               |        |            |            |                                   |
| Ga0374944_296679                                        | 3300035698 | CL6580_bin2037 | NA                     | NA              | NA            | 15125  | 0.28       | 52         | Bacteria                          |
| Ga0374944_296644                                        | 3300035698 | SG7011_bin2037 | NA                     | NA              | NA            | 18377  | 0.27       | 51         | Bacteria                          |
| Ga0374944_296647                                        | 3300035698 | CL9892_bin2037 | NA                     | NA              | NA            | 95297  | 0.28       | 49         | Bacteria                          |
| Ga0374944_296655                                        | 3300035698 | SG7313_bin2037 | NA                     | NA              | NA            | 25303  | 0.28       | 53         | Bacteria                          |
| Ga0374944_296656                                        | 3300035698 | SG7152_bin2037 | NA                     | NA              | NA            | 23852  | 0.29       | 52         | Bacteria                          |

|                  |            |                |    |    |    |       |      |    |          |
|------------------|------------|----------------|----|----|----|-------|------|----|----------|
| Ga0374944_296660 | 3300035698 | SG8115_bin2037 | NA | NA | NA | 11785 | 0.27 | 48 | Bacteria |
| Ga0374944_296661 | 3300035698 | CL6727_bin2037 | NA | NA | NA | 22803 | 0.28 | 54 | Bacteria |
| Ga0374944_296663 | 3300035698 | SG7974_bin2037 | NA | NA | NA | 23785 | 0.29 | 52 | Bacteria |
| Ga0374944_296671 | 3300035698 | CL9495_bin2037 | NA | NA | NA | 68414 | 0.28 | 51 | Bacteria |

\* See **Methods: Metagenome sequencing, assembly, annotation and overview of analyses** for taxonomic classification. NA, not applicable.

**Table S5** *Chlorobium* viruses and their potential hosts.

| Host phylum/class   | Potential host taxonomy*             | SG14554_D6                                                                                                                         | CL1024_D6A                           | CL1024_A14                                                                       |
|---------------------|--------------------------------------|------------------------------------------------------------------------------------------------------------------------------------|--------------------------------------|----------------------------------------------------------------------------------|
| Chlorobi            | <i>Chlorobaculum tepidum</i>         | S51, S52, S53, S54, S55, S56, S57, S58, S60 (1)                                                                                    |                                      | S2-2 (1)                                                                         |
|                     | <i>Chlorobium phaeobacteroides</i>   |                                                                                                                                    | S3_RC (1), S4_RC (1)                 | S1 (1), S3_RC (1), S4_RC (1)                                                     |
|                     | <i>Chlorobium phaeovibrioides</i>    | S20 (1), S21 (1), S22 (1)                                                                                                          | S3 (1), S4 (1), S3_RC (1), S4_RC (1) | S1 (1), S2 (3), S3 (1), S4 (1), S1-1 (1), S1_RC (1), S2_RC, S3_RC (1), S4_RC (1) |
|                     | <i>Prosthecochloris</i> sp. CIB 2401 | S62 (1)                                                                                                                            |                                      |                                                                                  |
| Deltaproteobacteria | Deltaproteobacteria                  |                                                                                                                                    |                                      | S12                                                                              |
|                     | Desulfuromonadaceae                  | S61_RC                                                                                                                             |                                      |                                                                                  |
|                     | Desulfuromonadales                   | S61 (1)                                                                                                                            |                                      |                                                                                  |
|                     | <i>Desulfuromonas</i>                | S61 (1)                                                                                                                            |                                      |                                                                                  |
| Gammaproteobacteria | <i>Acinetobacter</i> sp. C15         | S19                                                                                                                                |                                      |                                                                                  |
|                     | <i>Alcanivorax jadensis</i>          | S21 (1), S49_RC, S59, S49-1                                                                                                        | S11-1                                | S11-1                                                                            |
|                     | <i>Edwardsiella tarda</i>            | S19_RC                                                                                                                             |                                      |                                                                                  |
|                     | <i>Halomonas subterranea</i>         | S19                                                                                                                                |                                      |                                                                                  |
|                     | <i>Klebsiella pneumoniae</i>         | S23, S24, S24-1, S25, S26, S27, S28, S29, S30, S31, S32, S33, S34, S35, S35_RC-1, S36, S37, S38, S39, S40, S41, S42, S43, S44, S45 | S8, S11-1, S11, S13, S14, S15        | S8, S10, S11-1, S11                                                              |
|                     | <i>Legionella massiliensis</i>       | S48 (1), S48_RC (1)                                                                                                                |                                      |                                                                                  |
|                     | <i>Legionella pneumophila</i>        | S48-2 (1)                                                                                                                          |                                      |                                                                                  |
|                     | <i>Marinobacter antarcticus</i>      | S49, S49_RC                                                                                                                        | S17, S17_RC                          |                                                                                  |
|                     | <i>Marinobacter</i> sp.              | S21 (1), S21_RC, S41, S42, S63, S64, S65                                                                                           | S7 (1), S7_RC (1), S18               | S2 (3), S2_RC, S5, S7 (1), S7_RC (1)                                             |



|                 |                                 |          |        |        |
|-----------------|---------------------------------|----------|--------|--------|
|                 | <i>Nitrococcus mobilis</i>      |          | S6 (1) | S6 (1) |
|                 | <i>Vibrio cholerae</i>          | S50      |        |        |
| Firmicutes      | <i>Lactobacillus namurensis</i> | S46, S47 | S16    |        |
| Flavobacteria   | <i>Runella zeae</i>             | S31      |        |        |
| Verrucomicrobia | <i>Verrucomicrobium</i> sp. 3C  |          | S9     | S9     |

For designation purposes, of the 83 spacers with matches to the virus contigs (SG14554\_D6, CL1024\_D6A, and CL1024\_A14), 65 were numbered from S1-S65. The other 18 were either reverse complements of S1-S65 (designated by 'RC' after the spacer number) or their sequences were similar to S1-S65 but were shorter by  $\geq 1$  nt (designated by '-1' after the spacer number; e.g., S1 is 34 nt and S1-1 is 33 nt). Sequences that were both shorter and reverse complement were designated by 'RC-1' after the spacer number (see Additional file 4: Table S5 for spacer sequences). Numbers in parentheses are the number of host contigs that also had *cas* genes flanking the CRISPR arrays. The spacers highlighted in red had 90-99% identity matches to the respective virus contigs; all other spacer matches were 100% identical. The grey highlighted microbe is the most abundant OTU, *Chlorobium*, in Ace Lake. \* See **Methods: Metagenome sequencing, assembly, annotation and overview of analyses** for taxonomic classification.

**Table S6** Spacer sequences with matches to two CL1024 and one SG14554 contigs.

| Seq no. | Spacer matches                        | Spacer length | Designation* |
|---------|---------------------------------------|---------------|--------------|
| Seq1    | ATTTCTTCGGTGGCATATCAGAATTTGAGCTTA     | 33            | S1-1         |
| Seq2    | CAAGAGTCAACCCTGATCCAGTACTTCTCAGAA     | 33            | S2_RC        |
| Seq3    | CCCCGGCCCCCTAGGCCATCCGCGTCGTACCGCA    | 33            | S3           |
| Seq4    | TTGGGTGTCATGCTGCCATCGTTGCTCGTGTGG     | 33            | S4           |
| Seq5    | TAAGCTCAAATTCTGATATGCCACCGAAGAAATA    | 34            | S1_RC        |
| Seq6    | CGCTGGCGACTCAGTTATGATACAGTACGCCCC     | 33            | S5           |
| Seq7    | CGTATTCTATAAGACTATCTGTCGGCCATGATT     | 33            | S6           |
| Seq8    | CTGAACCCAAACTCACGAATGGCGGCTGCCAC      | 32            | S7           |
| Seq9    | GAGATCTTGCTGGTCCCTTTGGCCAAGATACTG     | 33            | S8           |
| Seq10   | GCGAAGAAGCTGGGCCTTGAGGAAGTGCCCGTG     | 33            | S9           |
| Seq11   | GTCAGTCGAATACAACCTAAGCAGCCCGAATA      | 33            | S10          |
| Seq12   | GTGGCAGCCGCCATTCGTGAGTTTGGGTTTCA      | 32            | S7_RC        |
| Seq13   | TATTTCTTCGGTGGCATATCAGAATTTGAGCTTA    | 34            | S1           |
| Seq14   | CCACACGAGCAACGATGGCAGCATGACACCCAA     | 33            | S4_RC        |
| Seq15   | TGCGGTACGACGCGGATGGCCTAGGGGCCGGGG     | 33            | S3_RC        |
| Seq16   | TCAGTGTGCGCATATCGAGAATGCCTTTTCCACT    | 33            | S11-1        |
| Seq17   | TCAGTGTGCGCATATCGAGAATGCCTTTTCCACTG   | 34            | S11          |
| Seq18   | TGAGTTTGGGTTTCAAGGTGCCTATCCTGGCAAAGTC | 36            | S12          |
| Seq19   | TTCTGAGAAGTACTGGATCAGGGTTGACTCT       | 31            | S2-2         |
| Seq20   | TTCTGAGAAGTACTGGATCAGGGTTGACTCTTG     | 33            | S2           |
| Seq21   | AGCTGTGCGATAAAGCGTAGTAGTGTCTCATGG     | 33            | S13          |
| Seq22   | GCTCTTGACACCGGTCAGCCATCGGTATGGGTG     | 33            | S14          |
| Seq23   | CAAAGCTCCTCAAGGCCCGTGCGATCACCCGGC     | 33            | S15          |
| Seq24   | TCAGCCGTGAAGAGCTTGAAGCCACCGAGGGTT     | 33            | S16          |
| Seq25   | GCGATGCGCTGAGTGTGGAGGGCAGAAGCAAGA     | 33            | S17          |
| Seq26   | TCTTGCTTCTGCCCTCCACACTCAGCGCATCGC     | 33            | S17_RC       |
| Seq27   | TATTGTTTTTTCGTTGACATGTTTTGTCA         | 29            | S18          |
| Seq28   | TTGGTCTGCTTTAGCGTCAAGTAGGTTGTAAACCTCC | 37            | S19          |
| Seq29   | TCTACTTTCGTCTGCGTTGGTATCAGCTCCCA      | 32            | S20          |
| Seq30   | ACGCAGTTGAGTATCAAGAAATTACATCCGCGA     | 33            | S21          |
| Seq31   | CGTCATCGCACCAACAGCCAATCCGGTATAA       | 31            | S22          |
| Seq32   | CACCACCATGCTGGGTGCTATATCGTATCCTTTT    | 34            | S23          |
| Seq33   | GGCTTTACGGCCTTTGCGCAGATAAGCGAAAA      | 32            | S24-1        |
| Seq34   | GGGGTGGGAGTTATACCGCGCACCCGATTGCCG     | 33            | S25          |
| Seq35   | GATACACTAAGGATCGATACAGCAATCACAGAA     | 33            | S26          |
| Seq36   | AGACTGGCACCTTTTATCTTGGCTGCTGGCGCAG    | 34            | S27          |
| Seq37   | CCTTTTCTTTGACAGCAAGGTAAATGGCACCAG     | 33            | S28          |
| Seq38   | TGAAGGGATTGCAGGCATCTGACAAGAGGATAA     | 33            | S29          |
| Seq39   | CTCATCGTCTTTGCGGTGCTCGTGTATGACAT      | 32            | S30          |
| Seq40   | CTGGGCTAGCGGGGCCCTGACAAGTGCGGCGCTC    | 34            | S31          |
| Seq41   | GGTACCAGTTACCGCGCCGACCATCCCCTTGCC     | 33            | S32          |
| Seq42   | CGACGGATAGACGGATACTATGGACTATCAAGT     | 33            | S33          |
| Seq43   | TTGAACAGCCGCTGCAAGTCAGGTTGGGCTTGG     | 33            | S34          |
| Seq44   | GTGGCTTCGCTGGCAAACGCTTTTAAGTTGCCG     | 33            | S35          |
| Seq45   | GGCTTTACGGCCTTTGCGCAGATAAGCGAAAA      | 33            | S24          |
| Seq46   | CGGAGGTAGTCTTTGGCCACCTCTTCGCGGAAGG    | 34            | S36          |
| Seq47   | TTGAGATTCTATCCGCGCACACAAATATGGATG     | 33            | S37          |
| Seq48   | TCAAGGCCAACGGTCTTTGCGTCGTTGACTTCC     | 33            | S38          |
| Seq49   | TGTTGGGTAGTTTGTCTGATCTGCGCACCCCTCGAA  | 34            | S39          |

|       |                                       |    |          |
|-------|---------------------------------------|----|----------|
| Seq50 | TTATCGGATGTTATACAGCAAGGCAGGAAACAGA    | 34 | S40      |
| Seq51 | ATCGTATGCCGCTGGATAGGCTCATCTGTTATG     | 33 | S41      |
| Seq52 | AGAGACATTGCCCTCAATGCTTATGGTTTTTGG     | 33 | S42      |
| Seq53 | GGCAACTTAAAAGCGTTTGCCAGCGAAGCCAC      | 32 | S35 RC-1 |
| Seq54 | GCATCGGCTTTATCCATTGCGCTCGTGAAGT       | 31 | S43      |
| Seq55 | TGACCACATCATTTCGCGAACCAAAAACCATAAG    | 33 | S44      |
| Seq56 | TGACTTCACGAGCGCAATGGATAAAGCTGATGC     | 33 | S45      |
| Seq57 | TTAACGGCGGTATCGCTACCCCTGACGTAATAG     | 33 | S46      |
| Seq58 | TACGATACCGGCTGGCGGACGAAATCGGGCCCTG    | 34 | S47      |
| Seq59 | GGACTACGCTCAATGCTATCGATATCCCGCCA      | 32 | S48 RC   |
| Seq60 | TGGCGGGATATCGATAGCATTGAGCGTAGTCC      | 32 | S48      |
| Seq61 | GCGGGATATCGATAGCATTGAGCGTAGTCC        | 30 | S48-2    |
| Seq62 | TCTTCATTTTGCCTACCGACAAGTCCACTATGA     | 33 | S49 RC   |
| Seq63 | TCATAGTGGACTTGTCGGTAGGCAAAATGAAGA     | 33 | S49      |
| Seq64 | TCGCGGATGTAATTTCTTGATACTCAACTGCGT     | 33 | S21 RC   |
| Seq65 | AAACAGGAATGGAGAACTAACATGGCCCAACAA     | 33 | S50      |
| Seq66 | CGCTACAATACCTTCGTGATCGGACTGGTGCC      | 32 | S51      |
| Seq67 | CTCACAACCGGTTTTAGCCCGCTCGTAACCTC      | 32 | S52      |
| Seq68 | CGCTTCGAGGTAAAACTGATCGCTCGGTTTTG      | 33 | S53      |
| Seq69 | TCCTTCGGCCCACGAGTCGATTATTTCCATGAA     | 33 | S54      |
| Seq70 | TCCAAGGGTCGATCATAGTGGACTTGTCGGTAG     | 33 | S55      |
| Seq71 | TTAGCATTATTTTTTAACTGTTTTGATTGTTG      | 32 | S56      |
| Seq72 | ATAGCACCCAGCATGGTGGTGATGAAGATAAC      | 32 | S57      |
| Seq73 | GAGCCGCTGCAAGTCAGGTTGGGCTTGGCTGAGG    | 34 | S58      |
| Seq74 | GGAGGTTAACAACCTACTTGACGCTAAAGCAGACCAA | 37 | S19 RC   |
| Seq75 | TCATAGTGGACTTGTCGGTAGGCAAAATGAAG      | 32 | S59      |
| Seq76 | GACGGCATAAATCCTCCACGGTTTTATTGTGT      | 32 | S49-1    |
| Seq77 | CACAAGCCCGAGAGCCGTAGCAAATCCCGCTGTT    | 34 | S60      |
| Seq78 | TAATCGCCAACGGCAATCGGGTGCGCGGTATAA     | 33 | S61      |
| Seq79 | TTATACCGCGCACCCGATTGCCGTTGGCGATTA     | 33 | S61 RC   |
| Seq80 | CGGCTTTGTCCTGATCCTCTTGGCTCCTATGTC     | 33 | S62      |
| Seq81 | TCGACGACATGGTAGGGCCGGGCGAAACGTGGT     | 33 | S63      |
| Seq82 | TATACATATTCGCAAATGACCCCAAAGAAGAAC     | 33 | S64      |
| Seq83 | CTGTGCTTGAGTTCTGGCAGGGGCATACTGCGT     | 33 | S65      |

\* For designations, see Table S4.

**Table S7** Host analysis of virus cluster 1024.

| Phylum/class | Contig taxonomy ‡                  | Cluster 1024 virus contig matches to spacers from host contigs |            |            |            |            |            |            |            |            |             |             |             |             |             |
|--------------|------------------------------------|----------------------------------------------------------------|------------|------------|------------|------------|------------|------------|------------|------------|-------------|-------------|-------------|-------------|-------------|
|              |                                    | CL1024_D6A                                                     | CL1024_D6B | CL1024_D6C | CL1024_N8A | CL1024_N8B | CL1024_N8C | CL1024_N13 | CL1024_J14 | CL1024_A14 | CL1024_D14A | CL1024_D14B | CL1024_D14C | CL1024_D14D | CL1024_D14E |
| Chlorobi     | <i>Chlorobium phaeobacteroides</i> | 100                                                            | 100        | 100        | 100        | 100        | 100        | 100        | 100        | 100        | 100         | 100         | 100         | 100         | 100         |
|              | <i>Chlorobium phaeovibrioides</i>  | 100                                                            | 100        | 100        | 100        | 100        | 100        | 100        | 100        | 100        | 100         | 100         | 100         | 100         | 100         |
|              | <i>Chlorobium phaeovibrioides</i>  | 100                                                            | 100        | 100        | 100        | 100        | 100        | 100        | 100        | 100        | 100         | 100         | 100         | 100         | 100         |
|              | <i>Chlorobium phaeovibrioides</i>  | 100                                                            | 100        | 100        | 100        | 100        | 100        | 100        | 100        | 100        | 100         | 100         | 100         | 100         | 100         |
|              | <i>Chlorobium phaeovibrioides</i>  |                                                                |            | 90-99      |            | 100        |            |            |            |            | 100         |             |             |             |             |
|              | <i>Chlorobium phaeovibrioides</i>  |                                                                |            | 90-99      |            | 100        |            |            |            |            | 100         |             |             |             |             |
|              | <i>Chlorobium phaeovibrioides</i>  |                                                                |            | 90-99      |            | 100        |            |            |            |            | 100         |             |             |             |             |
|              | <i>Chlorobium phaeovibrioides</i>  |                                                                |            | 90-99      |            | 100        |            |            |            |            | 100         |             |             |             |             |
|              | <i>Chlorobium phaeovibrioides</i>  |                                                                |            | 90-99      |            | 100        |            |            |            |            | 100         |             |             |             |             |
|              | <i>Chlorobium phaeovibrioides</i>  |                                                                |            | 90-99      |            | 100        |            |            |            |            | 100         |             |             |             |             |
|              | <i>Chlorobium phaeovibrioides</i>  |                                                                |            | 90-99      |            | 100        |            |            |            |            | 100         |             |             |             |             |
|              | <i>Chlorobium phaeovibrioides</i>  |                                                                |            | 90-99      |            | 100        |            |            |            |            | 100         |             |             |             |             |
|              | <i>Chlorobium phaeovibrioides</i>  |                                                                | 100        |            |            | 100        | 90-99      | 100        | 100        | 100        | 100         | 100         | 100         | 100         | 100         |
|              | <i>Chlorobium phaeovibrioides</i>  |                                                                |            | 90-99      |            | 100        |            | 90-99      |            | 100        | 100         | 100         | 100         | 100         |             |
|              | <i>Chlorobium phaeovibrioides</i>  |                                                                |            | 90-99      |            | 100        |            | 90-99      |            | 100        | 100         | 100         | 100         | 100         |             |
|              | <i>Chlorobium phaeovibrioides</i>  |                                                                |            | 90-99      |            | 100        |            | 90-99      |            | 100        | 100         | 100         | 100         | 100         |             |
|              | <i>Chlorobium phaeovibrioides</i>  |                                                                |            |            |            | 100        |            | 90-99      |            | 100        |             | 100         | 100         | 100         |             |
|              | <i>Chlorobium phaeovibrioides</i>  |                                                                |            |            |            | 100        |            | 90-99      |            | 100        |             | 100         | 100         | 100         |             |
|              | <i>Chlorobium phaeovibrioides</i>  |                                                                |            |            |            | 100        |            | 90-99      |            | 100        |             | 100         | 100         | 100         |             |
|              | <i>Chlorobaculum tepidum*</i>      |                                                                |            |            |            | 100        |            | 90-99      |            | 100        |             | 100         | 100         | 100         |             |
|              | <i>Chlorobium*</i>                 |                                                                |            | 90-99      |            | 100        |            |            |            |            | 100         |             |             |             |             |

|                     |                                 |       |       |       |       |       |       |       |       |       |       |       |       |       |       |
|---------------------|---------------------------------|-------|-------|-------|-------|-------|-------|-------|-------|-------|-------|-------|-------|-------|-------|
|                     | Chlorobiaceae*                  |       |       | 90-99 |       | 100   |       |       |       |       | 100   |       |       |       |       |
| Deltaproteobacteria | Deltaproteobacteria*            | 100   |       | 100   | 100   | 100   |       |       |       | 100   |       |       | 100   |       |       |
| Gammaproteobacteria | <i>Alcanivorax jadensis</i>     | 100   | 100   | 100   | 100   | 100   | 100   | 100   | 100   | 100   | 100   | 100   | 90-99 | 100   | 100   |
|                     | <i>Klebsiella pneumoniae</i>    | 100   | 100   | 100   | 100   | 100   | 100   | 100   | 100   | 100   | 100   | 100   | 90-99 | 100   | 100   |
|                     | <i>Klebsiella pneumoniae</i>    | 100   | 100   | 100   | 100   | 100   | 100   | 100   | 100   | 100   | 100   | 100   | 90-99 | 100   | 100   |
|                     | <i>Klebsiella pneumoniae</i>    | 100   | 100   | 100   | 100   | 100   | 100   | 100   | 100   | 100   | 100   | 100   | 90-99 | 100   | 100   |
|                     | <i>Klebsiella pneumoniae</i>    | 100   | 100   | 100   | 100   | 100   | 100   | 100   | 100   | 100   | 100   | 100   | 90-99 | 100   | 100   |
|                     | <i>Klebsiella pneumoniae</i>    | 90-99 | 90-99 | 90-99 | 90-99 | 90-99 | 90-99 | 90-99 | 90-99 | 90-99 | 90-99 | 90-99 | 90-99 | 90-99 |       |
|                     | <i>Klebsiella pneumoniae</i>    |       | 90-99 | 90-99 | 90-99 | 90-99 | 90-99 | 90-99 | 90-99 |       | 90-99 | 90-99 | 90-99 | 90-99 | 90-99 |
|                     | <i>Klebsiella pneumoniae</i>    |       | 90-99 | 90-99 | 90-99 | 90-99 | 90-99 | 90-99 | 90-99 |       | 90-99 | 90-99 | 90-99 | 90-99 | 90-99 |
|                     | <i>Klebsiella pneumoniae</i>    | 90-99 |       |       |       | 90-99 |       |       |       |       |       | 90-99 |       |       |       |
|                     | <i>Klebsiella pneumoniae</i>    | 100   | 100   |       |       |       |       |       |       |       |       |       |       |       |       |
|                     | <i>Klebsiella pneumoniae</i>    |       | 90-99 |       |       |       | 90-99 |       |       |       | 90-99 |       |       |       |       |
|                     | <i>Klebsiella pneumoniae</i>    |       | 90-99 |       |       |       | 90-99 |       |       |       | 90-99 |       |       |       |       |
|                     | <i>Klebsiella pneumoniae</i> *  |       | 100   |       |       | 100   | 100   | 100   | 100   | 100   | 100   | 100   | 100   | 100   | 100   |
|                     | <i>Klebsiella pneumoniae</i> *  |       | 90-99 |       |       |       |       |       |       |       |       |       |       |       |       |
|                     | <i>Marinobacter antarcticus</i> | 90-99 | 100   | 100   | 90-99 | 90-99 | 100   |       | 90-99 |       | 90-99 | 90-99 |       |       |       |
|                     | <i>Marinobacter antarcticus</i> | 90-99 | 100   | 100   | 90-99 | 90-99 | 100   |       | 90-99 |       | 90-99 | 90-99 |       |       |       |
|                     | <i>Marinobacter antarcticus</i> |       |       | 90-99 |       | 100   |       |       |       |       | 100   |       |       |       |       |
|                     | <i>Marinobacter antarcticus</i> |       |       | 90-99 |       | 100   |       |       |       |       | 100   |       |       |       |       |
|                     | <i>Marinobacter</i> sp.         |       | 90-99 | 90-99 | 90-99 | 90-99 | 90-99 | 90-99 | 90-99 |       | 90-99 | 90-99 | 90-99 | 90-99 | 90-99 |
|                     | <i>Marinobacter</i> sp.         |       |       | 90-99 | 90-99 | 90-99 | 90-99 |       | 90-99 |       | 90-99 | 90-99 |       |       |       |
|                     | <i>Marinobacter</i> sp.         |       |       | 90-99 | 90-99 | 90-99 | 90-99 |       | 90-99 |       | 90-99 | 90-99 |       |       |       |
|                     | <i>Marinobacter</i> sp.         |       |       | 90-99 | 90-99 | 90-99 | 90-99 |       | 90-99 |       | 90-99 | 90-99 |       |       |       |
|                     | <i>Marinobacter</i> sp.         |       |       | 90-99 | 90-99 | 90-99 | 90-99 |       | 90-99 |       | 90-99 | 90-99 |       |       |       |
|                     | <i>Marinobacter</i> sp.         |       |       | 90-99 |       | 100   |       |       |       |       | 100   |       |       |       |       |
|                     | <i>Marinobacter</i> sp.         |       |       | 90-99 |       | 100   |       |       |       |       | 100   |       |       |       |       |
|                     | <i>Marinobacter</i> sp.         |       |       | 90-99 |       | 100   |       | 90-99 |       | 100   | 100   | 100   | 100   | 100   |       |
|                     | <i>Marinobacter</i> sp.         |       |       |       |       | 100   |       | 90-99 |       | 100   |       | 100   | 100   | 100   |       |

|                    |                                 |       |       |       |       |       |       |       |       |       |       |       |       |       |       |
|--------------------|---------------------------------|-------|-------|-------|-------|-------|-------|-------|-------|-------|-------|-------|-------|-------|-------|
|                    | <i>Marinobacter</i> sp.         |       |       |       |       | 100   |       | 90-99 |       | 100   |       | 100   | 100   | 100   |       |
|                    | <i>Marinobacter</i> sp.         |       |       |       |       | 100   |       | 90-99 |       | 100   |       | 100   | 100   | 100   |       |
|                    | <i>Marinobacter</i> sp.         |       |       |       |       | 100   |       | 90-99 |       | 100   |       | 100   | 100   | 100   |       |
|                    | <i>Marinobacter</i> sp.         |       |       |       |       | 100   |       | 90-99 |       | 100   |       | 100   | 100   | 100   |       |
|                    | <i>Marinobacter</i> sp.         |       |       |       |       | 100   |       | 90-99 |       | 100   |       | 100   | 100   | 100   |       |
|                    | <i>Marinobacter</i> sp.         |       |       |       |       | 100   |       | 90-99 |       | 100   |       | 100   | 100   | 100   |       |
|                    | <i>Marinobacter</i> sp.*        | 90-99 |       | 90-99 | 90-99 | 90-99 |       |       |       | 90-99 |       |       | 90-99 |       |       |
|                    | <i>Marinobacter</i> sp.*        | 90-99 |       | 90-99 | 90-99 | 90-99 |       |       |       | 90-99 |       |       | 90-99 |       |       |
|                    | <i>Marinobacter</i> sp.*        |       | 90-99 |       | 90-99 | 90-99 | 90-99 | 90-99 | 90-99 | 90-99 | 90-99 | 90-99 | 90-99 | 90-99 | 90-99 |
|                    | <i>Marinobacter</i> sp.*        |       |       | 90-99 | 90-99 | 90-99 | 90-99 |       | 90-99 |       | 90-99 | 90-99 |       |       |       |
|                    | <i>Vibrio cholerae</i>          |       |       | 90-99 |       | 100   |       |       |       |       | 100   |       |       |       |       |
|                    | <i>Marinospirillum celere</i> * |       | 90-99 | 90-99 | 90-99 | 90-99 | 90-99 | 90-99 | 90-99 |       | 90-99 | 90-99 | 90-99 | 90-99 | 90-99 |
|                    | <i>Nitrococcus mobilis</i> *    |       | 90-99 |       |       |       | 90-99 |       |       |       | 90-99 |       |       |       |       |
|                    | Gammaproteobacteria*            |       | 90-99 | 90-99 | 90-99 | 90-99 | 90-99 | 90-99 | 90-99 |       | 90-99 | 90-99 | 90-99 | 90-99 | 90-99 |
| Betaproteobacteria | <i>Delftia lacustris</i> *      |       | 90-99 | 90-99 | 90-99 | 90-99 | 90-99 | 90-99 | 90-99 |       | 90-99 | 90-99 | 90-99 | 90-99 | 90-99 |
| Verrucomicrobia    | <i>Verrucomicrobium</i> sp. 3C  | 100   | 100   | 100   | 100   | 100   | 100   | 100   | 100   | 100   | 100   | 100   | 100   | 100   | 100   |
|                    | Bacteria*                       |       | 90-99 | 90-99 | 90-99 | 90-99 | 90-99 | 90-99 | 90-99 |       | 90-99 | 90-99 | 90-99 | 90-99 | 90-99 |
|                    | Bacteria*                       |       |       | 90-99 |       | 100   |       |       |       |       | 100   |       |       |       |       |

The values are % identity matches of cluster 1024 virus contigs to host contig spacers. The dark grey-shaded cells indicate 100% identity matches, whereas the light grey-shaded cells indicate 90-99% identity matches. The unshaded cells with no values indicate that the virus contig in the corresponding column had no hits to spacers from the host contig in the corresponding row. ‡ Each row represents a contig with taxonomy assigned as described in **Methods: Metagenome sequencing, assembly, annotation and overview of analyses**. \*For specific host contigs the IMG taxonomic assignment was used. For full details of CL1024 contigs see Additional file 4: Table S9.

**Table S8** Most abundant virus clusters in Ace Lake.

| <b>Virus cluster</b> | <b>Ace Lake zone in which abundant</b> | <b>Read depth of a virus cluster compared to the <i>Chlorobium</i> peak read depth ‡</b> | <b>Probable host †</b>     |
|----------------------|----------------------------------------|------------------------------------------------------------------------------------------|----------------------------|
| 20                   | Upper                                  | 2.4                                                                                      | Eukarya                    |
| 463                  | Upper                                  | 1.6                                                                                      | Bacteria                   |
| 5                    | Upper                                  | 1                                                                                        | Bacteria                   |
| 159                  | Upper                                  | 1                                                                                        | Bacteria                   |
| 9                    | Upper                                  | 0.9                                                                                      | Eukarya                    |
| 7                    | Upper                                  | 0.8                                                                                      | Eukarya                    |
| 35                   | Upper                                  | 0.8                                                                                      | Eukarya                    |
| 32                   | Upper                                  | 0.7                                                                                      | Eukarya                    |
| 54                   | Upper                                  | 0.7                                                                                      | Unknown                    |
| 89                   | Upper                                  | 0.7                                                                                      | Unknown; Ace lake-specific |
| 191                  | Upper                                  | 0.7                                                                                      | Unknown; Ace lake-specific |
| 400                  | Interface and Lower                    | 0.7                                                                                      | Unknown; Ace lake-specific |
| 11                   | Upper                                  | 0.6                                                                                      | Bacteria                   |
| 37                   | Upper                                  | 0.6                                                                                      | Unknown; Ace lake-specific |
| 66                   | Upper                                  | 0.6                                                                                      | Eukarya                    |
| 248                  | Interface and Lower                    | 0.6                                                                                      | Unknown; Ace lake-specific |
| 295                  | Upper                                  | 0.6                                                                                      | Bacteria                   |

‡ The read depth of virus contigs corresponding to a cluster are the sum of the read depths for a sampling time period, incorporating all lake depths and all filter fractions. This value was divided by the peak read depth for *Chlorobium*. Clusters with total read depth >4000 (~0.6 of the *Chlorobium* peak read depth) in at least one time period are shown. No virus singletons had read depth >4000. † The probable hosts of the most abundant virus clusters were identified based on the host assignments of the virus clusters in the IMG/VR viral database, i.e. contigs belonging to the same cluster and without a host assignment were associated to the host predicted for other member(s) of the cluster (if any).

**Table S9** Metadata associated with *Chlorobium* viruses.

| Contig ID         | Taxon ID   | Given name  | Sample collection date | Filter fraction ‡ | Ace Lake zone | Length | GC content | Read depth | Taxonomy*                           |
|-------------------|------------|-------------|------------------------|-------------------|---------------|--------|------------|------------|-------------------------------------|
| Ga0302060_10025   | 3300028201 | CL1024_D6A  | Dec 2006               | 0.8               | Interface     | 11188  | 0.48       | 34         | Unassigned                          |
| Ga0302061_10032   | 3300028203 | CL1024_D6B  | Dec 2006               | 3                 | Interface     | 8085   | 0.49       | 13         | Vibrio phage VBM1                   |
| Ga0302067_10039   | 3300028204 | CL1024_D6C  | Dec 2006               | 0.1               | Interface     | 6665   | 0.45       | 24         | Unassigned                          |
| Ga0208900_1004295 | 3300025433 | CL1024_N8A  | Nov 2008               | 3                 | Interface     | 5426   | 0.48       | 613        | Unassigned                          |
| Ga0208904_1006197 | 3300025669 | CL1024_N8B  | Nov 2008               | 0.1               | Lower 2       | 6239   | 0.48       | 37         | Unassigned                          |
| Ga0208905_1004525 | 3300025661 | CL1024_N8C  | Nov 2008               | 0.8               | Lower 3       | 6310   | 0.48       | 46         | Unassigned                          |
| Ga0222638_1002074 | 3300023298 | CL1024_N13  | Nov 2013               | 3                 | Lower 2       | 5603   | 0.48       | 28         | Unassigned                          |
| Ga0222656_1001806 | 3300022834 | CL1024_J14  | Jul 2014               | 3                 | Interface     | 5624   | 0.48       | 29         | Unassigned                          |
| Ga0222665_1003383 | 3300022864 | CL1024_A14  | Aug 2014               | 3                 | Interface     | 5317   | 0.47       | 24         | Unassigned                          |
| Ga0222689_1000957 | 3300023231 | CL1024_D14A | Dec 2014               | 3                 | Upper 3       | 6117   | 0.48       | 27         | Unassigned                          |
| Ga0222690_1000793 | 3300023227 | CL1024_D14B | Dec 2014               | 0.8               | Upper 3       | 6492   | 0.47       | 50         | Unassigned                          |
| Ga0222695_1002624 | 3300023253 | CL1024_D14C | Dec 2014               | 3                 | Lower 1       | 5952   | 0.48       | 30         | Unassigned                          |
| Ga0222696_1002166 | 3300023233 | CL1024_D14D | Dec 2014               | 0.8               | Lower 1       | 5599   | 0.48       | 37         | Unassigned                          |
| Ga0222699_1002408 | 3300022846 | CL1024_D14E | Dec 2014               | 0.8               | Lower 1       | 5369   | 0.47       | 40         | Unassigned                          |
| Ga0302067_10019   | 3300028204 | SG14554_D6  | Dec 2006               | 0.1               | Interface     | 14104  | 0.51       | 146        | Vibrio phage VBM1                   |
| Ga0302060_10018   | 3300028201 | CL248       | Dec 2006               | 0.8               | Interface     | 17393  | 0.5        | 79         | <i>Sphingomonas histidinilytica</i> |
| Ga0302061_10026   | 3300028203 | CL248       | Dec 2006               | 3                 | Interface     | 10117  | 0.52       | 28         | <i>Sphingomonas histidinilytica</i> |
| Ga0302067_10021   | 3300028204 | CL248       | Dec 2006               | 0.1               | Interface     | 12817  | 0.51       | 66         | <i>Sphingomonas histidinilytica</i> |
| Ga0302056_100137  | 3300028227 | CL248       | Dec 2006               | 0.8               | Lower 2       | 7336   | 0.51       | 6          | <i>Sphingomonas histidinilytica</i> |
| Ga0302055_100061  | 3300028226 | CL248       | Dec 2006               | 0.8               | Lower 3       | 8566   | 0.51       | 10         | <i>Sphingomonas histidinilytica</i> |
| Ga0302070_100065  | 3300028296 | CL248       | Dec 2006               | 0.1               | Lower 3       | 7664   | 0.49       | 6          | <i>Sphingomonas histidinilytica</i> |
| Ga0302070_100157  | 3300028296 | CL248       | Dec 2006               | 0.1               | Lower 3       | 5159   | 0.51       | 7          | <i>Sphingomonas histidinilytica</i> |



|                   |            |       |          |     |           |      |      |     |                                     |
|-------------------|------------|-------|----------|-----|-----------|------|------|-----|-------------------------------------|
| Ga0208279_1004110 | 3300025649 | CL248 | Nov 2008 | 3   | Lower 1   | 6103 | 0.51 | 515 | <i>Sphingomonas histidinilytica</i> |
| Ga0208902_1002585 | 3300025628 | CL248 | Nov 2008 | 0.8 | Lower 1   | 8161 | 0.51 | 136 | <i>Sphingomonas histidinilytica</i> |
| Ga0208769_1002379 | 3300025697 | CL248 | Nov 2008 | 0.1 | Lower 1   | 7992 | 0.51 | 143 | <i>Sphingomonas histidinilytica</i> |
| Ga0207996_1003791 | 3300025586 | CL248 | Nov 2008 | 0.8 | Lower 2   | 7966 | 0.51 | 189 | <i>Sphingomonas histidinilytica</i> |
| Ga0208904_1004243 | 3300025669 | CL248 | Nov 2008 | 0.1 | Lower 2   | 8059 | 0.51 | 284 | <i>Sphingomonas histidinilytica</i> |
| Ga0222626_1002761 | 3300022882 | CL248 | Nov 2013 | 3   | Interface | 6100 | 0.51 | 383 | <i>Sphingomonas histidinilytica</i> |
| Ga0222627_1001894 | 3300023244 | CL248 | Nov 2013 | 0.8 | Interface | 6106 | 0.51 | 365 | <i>Sphingomonas histidinilytica</i> |
| Ga0222628_1002177 | 3300022871 | CL248 | Nov 2013 | 0.1 | Interface | 6106 | 0.51 | 796 | <i>Sphingomonas histidinilytica</i> |
| Ga0222635_1001297 | 3300023234 | CL248 | Nov 2013 | 3   | Lower 1   | 7103 | 0.51 | 131 | <i>Sphingomonas histidinilytica</i> |
| Ga0222636_1002821 | 3300022854 | CL248 | Nov 2013 | 0.8 | Lower 1   | 5518 | 0.51 | 104 | <i>Sphingomonas histidinilytica</i> |
| Ga0222637_1002828 | 3300023435 | CL248 | Nov 2013 | 0.1 | Lower 1   | 5215 | 0.51 | 73  | <i>Sphingomonas histidinilytica</i> |
| Ga0222639_1002111 | 3300023262 | CL248 | Nov 2013 | 0.8 | Lower 2   | 8030 | 0.51 | 157 | <i>Sphingomonas histidinilytica</i> |
| Ga0222640_1001468 | 3300023297 | CL248 | Nov 2013 | 0.1 | Lower 2   | 6934 | 0.51 | 138 | <i>Sphingomonas histidinilytica</i> |
| Ga0222641_1000777 | 3300022828 | CL248 | Nov 2013 | 3   | Lower 3   | 5218 | 0.52 | 91  | <i>Sphingomonas histidinilytica</i> |
| Ga0222679_1001284 | 3300022858 | CL248 | Oct 2014 | 0.1 | Lower 1   | 7692 | 0.51 | 68  | <i>Sphingomonas histidinilytica</i> |
| Ga0222682_1001695 | 3300023246 | CL248 | Oct 2014 | 0.1 | Lower 2   | 5038 | 0.52 | 108 | <i>Sphingomonas histidinilytica</i> |

|                   |            |       |          |     |           |       |      |      |                                     |
|-------------------|------------|-------|----------|-----|-----------|-------|------|------|-------------------------------------|
| Ga0222686_1001026 | 3300023501 | CL248 | Dec 2014 | 3   | Upper 2   | 6903  | 0.51 | 150  | <i>Sphingomonas histidinilytica</i> |
| Ga0222689_1000893 | 3300023231 | CL248 | Dec 2014 | 3   | Upper 3   | 6437  | 0.51 | 926  | <i>Sphingomonas histidinilytica</i> |
| Ga0222689_1001025 | 3300023231 | CL248 | Dec 2014 | 3   | Upper 3   | 5833  | 0.5  | 954  | Unassigned                          |
| Ga0222691_1002182 | 3300022851 | CL248 | Dec 2014 | 0.1 | Upper 3   | 5045  | 0.52 | 38   | <i>Sphingomonas histidinilytica</i> |
| Ga0222695_1002611 | 3300023253 | CL248 | Dec 2014 | 3   | Lower 1   | 5972  | 0.5  | 264  | Unassigned                          |
| Ga0222696_1001254 | 3300023233 | CL248 | Dec 2014 | 0.8 | Lower 1   | 8225  | 0.5  | 132  | <i>Sphingomonas histidinilytica</i> |
| Ga0222698_1001226 | 3300022860 | CL248 | Dec 2014 | 3   | Lower 2   | 7682  | 0.5  | 354  | Unassigned                          |
| Ga0222698_1002050 | 3300022860 | CL248 | Dec 2014 | 3   | Lower 2   | 5591  | 0.51 | 399  | <i>Sphingomonas histidinilytica</i> |
| Ga0222699_1001059 | 3300022846 | CL248 | Dec 2014 | 0.8 | Lower 2   | 8592  | 0.51 | 279  | <i>Sphingomonas histidinilytica</i> |
| Ga0222700_1001281 | 3300023061 | CL248 | Dec 2014 | 0.1 | Lower 2   | 5063  | 0.51 | 82   | <i>Sphingomonas histidinilytica</i> |
| Ga0222701_1001644 | 3300022884 | CL248 | Dec 2014 | 3   | Lower 3   | 6103  | 0.51 | 265  | <i>Sphingomonas histidinilytica</i> |
| Ga0222702_1001705 | 3300023299 | CL248 | Dec 2014 | 0.8 | Lower 3   | 6313  | 0.51 | 233  | <i>Sphingomonas histidinilytica</i> |
| Ga0208414_1003043 | 3300025603 | CL400 | Nov 2008 | 0.1 | Upper 2   | 10451 | 0.34 | 20   | Unassigned                          |
| Ga0208900_1002555 | 3300025433 | CL400 | Nov 2008 | 3   | Interface | 8218  | 0.33 | 308  | Unassigned                          |
| Ga0208901_1000990 | 3300025380 | CL400 | Nov 2008 | 0.1 | Interface | 8545  | 0.33 | 452  | Unassigned                          |
| Ga0208647_1000742 | 3300025362 | CL400 | Nov 2008 | 0.1 | Interface | 7900  | 0.33 | 954  | Unassigned                          |
| Ga0208279_1002046 | 3300025649 | CL400 | Nov 2008 | 3   | Lower 1   | 10106 | 0.33 | 128  | Unassigned                          |
| Ga0208902_1002371 | 3300025628 | CL400 | Nov 2008 | 0.1 | Lower 1   | 8544  | 0.33 | 256  | Unassigned                          |
| Ga0208769_1002438 | 3300025697 | CL400 | Nov 2008 | 0.1 | Lower 1   | 7877  | 0.33 | 341  | Unassigned                          |
| Ga0207996_1003599 | 3300025586 | CL400 | Nov 2008 | 0.1 | Lower 2   | 8246  | 0.33 | 539  | Unassigned                          |
| Ga0208904_1004387 | 3300025669 | CL400 | Nov 2008 | 0.1 | Lower 2   | 7890  | 0.33 | 1030 | Unassigned                          |
| Ga0208771_1002615 | 3300025698 | CL400 | Nov 2008 | 3   | Lower 3   | 8545  | 0.33 | 310  | Unassigned                          |
| Ga0208905_1003078 | 3300025661 | CL400 | Nov 2008 | 0.1 | Lower 3   | 7889  | 0.33 | 336  | Unassigned                          |
| Ga0207997_1003371 | 3300025736 | CL400 | Nov 2008 | 0.1 | Lower 3   | 7890  | 0.33 | 399  | Unassigned                          |

|           |         |            |       |          |     |           |       |      |     |            |
|-----------|---------|------------|-------|----------|-----|-----------|-------|------|-----|------------|
| Ga0222635 | 1001119 | 3300023234 | CL400 | Nov 2013 | 3   | Lower 1   | 7890  | 0.33 | 112 | Unassigned |
| Ga0222638 | 1001230 | 3300023298 | CL400 | Nov 2013 | 3   | Lower 2   | 7890  | 0.33 | 82  | Unassigned |
| Ga0222656 | 1001064 | 3300022834 | CL400 | Jul 2014 | 3   | Interface | 7890  | 0.33 | 82  | Unassigned |
| Ga0222658 | 1003935 | 3300023257 | CL400 | Jul 2014 | 0.1 | Interface | 5310  | 0.34 | 481 | Unassigned |
| Ga0222666 | 1002834 | 3300024048 | CL400 | Aug 2014 | 0.1 | Interface | 5311  | 0.34 | 279 | Unassigned |
| Ga0222673 | 1001116 | 3300022821 | CL400 | Oct 2014 | 0.1 | Interface | 9687  | 0.33 | 30  | Unassigned |
| Ga0222677 | 1001056 | 3300022855 | CL400 | Oct 2014 | 3   | Lower 1   | 7889  | 0.33 | 117 | Unassigned |
| Ga0222681 | 1001368 | 3300022838 | CL400 | Oct 2014 | 0.1 | Lower 2   | 7890  | 0.33 | 59  | Unassigned |
| Ga0222682 | 1001525 | 3300023246 | CL400 | Oct 2014 | 0.1 | Lower 2   | 5311  | 0.34 | 146 | Unassigned |
| Ga0222685 | 1000765 | 3300022874 | CL400 | Oct 2014 | 0.1 | Lower 3   | 7889  | 0.33 | 167 | Unassigned |
| Ga0222689 | 1000515 | 3300023231 | CL400 | Dec 2014 | 3   | Upper 2   | 10005 | 0.33 | 31  | Unassigned |
| Ga0222691 | 1000883 | 3300022851 | CL400 | Dec 2014 | 0.1 | Upper 2   | 9331  | 0.33 | 23  | Unassigned |
| Ga0222700 | 1000514 | 3300023061 | CL400 | Dec 2014 | 0.1 | Lower 2   | 7890  | 0.33 | 148 | Unassigned |
| Ga0222701 | 1002009 | 3300022884 | CL400 | Dec 2014 | 3   | Lower 3   | 5311  | 0.34 | 132 | Unassigned |

‡ Filter fractions: 3, 20–3 µm; 0.8, 3–0.8 µm; 0.1, 0.8–0.1 µm \* see **Methods: Metagenome sequencing, assembly, annotation and overview of analyses** for taxonomic classification.

**Table S10** Metadata for the cluster 24 ‘huge’ phage.

| <b>Metagenome<sup>A</sup></b><br>(sample collection date,<br>depth, filter fraction) | <b>Taxon ID</b> | <b>Contig ID</b>  | <b>Contig length<br/>(bp)</b> | <b>GC content</b> | <b>Relative<br/>abundance (%)<sup>B</sup></b> | <b>Cas genes identified<br/>(number of spacer<br/>sequences)<sup>C</sup></b> |
|--------------------------------------------------------------------------------------|-----------------|-------------------|-------------------------------|-------------------|-----------------------------------------------|------------------------------------------------------------------------------|
| Nov 2008_L1_0.1 µm                                                                   | 3300025697      | Ga0208769_1000001 | 528,260                       | 0.56              | 0.9                                           | Yes (14)                                                                     |
| Nov 2008_L2_0.1 µm                                                                   | 3300025669      | Ga0208904_1000003 | 447,854                       | 0.56              | 1                                             | Yes (16)                                                                     |
| Nov 2008_L3_3 µm                                                                     | 3300025698      | Ga0208771_1000001 | 528,138                       | 0.56              | 0.2                                           | Yes (14)                                                                     |
| Nov 2013_L1_0.1 µm                                                                   | 3300023435      | Ga0222637_1000003 | 323,923                       | 0.56              | 1                                             |                                                                              |
|                                                                                      |                 | Ga0222637_1000005 | 204,206                       | 0.56              | 1                                             | Yes (16)                                                                     |
| Nov 2013_L2_0.1 µm                                                                   | 3300023297      | Ga0222640_1000001 | 528,282                       | 0.56              | 1                                             | Yes (16)                                                                     |
| Oct 2014_L1_0.1 µm                                                                   | 3300022858      | Ga0222679_1000001 | 528,258                       | 0.56              | 2                                             | Yes (16)                                                                     |
| Oct 2014_L2_0.1 µm                                                                   | 3300023246      | Ga0222682_1000001 | 528,256                       | 0.56              | 1                                             | Yes (14)                                                                     |
| Dec 2014_L2_0.1 µm                                                                   | 3300023061      | Ga0222700_1000001 | 521,772                       | 0.56              | 1                                             | Yes (16)                                                                     |
| Metabat2 co-assembly<br>MAGs (bin1297)*                                              | 3300035698      | Ga0374944_093690  | 42,584                        | 0.57              | NA                                            |                                                                              |
|                                                                                      |                 | Ga0374944_093691  | 204,460                       | 0.56              | NA                                            | Yes (14)                                                                     |
|                                                                                      |                 | Ga0374944_093692  | 216,989                       | 0.57              | NA                                            |                                                                              |

<sup>A</sup> Metagenome data containing complete (or nearly complete) cluster 24 ‘huge’ phage. Depths: L1, lower 1; L2, lower 2; L3, lower 3. Filter fractions: 3, 20–3 µm; 0.1, 0.8–0.1 µm. <sup>B</sup> Relative abundances of individual virus contigs calculated as described in **Methods: Calculations of taxonomic abundance**. <sup>C</sup> Cas gene annotations from IMG were manually verified. \* MetaBAT2 co-assembly MAGs generated as described in **Methods: Metagenome sequencing, assembly, annotation and overview of analyses**. The three contigs (from a total of five in bin1297) that were assigned to cluster 24 are listed. The red-highlighted entries are the complete, circular phage shown in Additional file 4: Table S1.
